1                   **Sex-biased genetic programs in liver metabolism and liver fibrosis**  
2                                   **are controlled by EZH1 and EZH2**

3  
4  
5                   Dana Lau-Corona<sup>1</sup>, Woo Kyun Bae<sup>2</sup>, Lothar Hennighausen<sup>2</sup> and David J Waxman<sup>1\*</sup>

6  
7                   <sup>1</sup>Department of Biology and Bioinformatics Program, Boston University, Boston, MA 02215

8                   <sup>2</sup>Laboratory of Genetics and Physiology, National Institute of Diabetes and Digestive and Kidney  
9                   Diseases, National Institutes of Health, Bethesda, MD 20892, USA

10  
11  
12   Running title: Liver sex bias controlled by Ezh1/Ezh2

13  
14   Key words: PRC2; Cytochrome P450; Sulfotransferase; Igf2; ChIP-seq; histone acetylation; carbon-  
15   tetrachloride; hypophysectomy; histone-lysine N-methyltransferase  
16

17  
18  
19  
20  
21   **Corresponding author:**

22   David J. Waxman  
23   Dept. of Biology, Boston University  
24   5 Cummington Mall  
25   Boston, MA 02215  
26   Email: djw@bu.edu  
27

28   Supported in part by NIH grant DK33765 (to DJW)

29

30 **Summary**  
31

32 Background: Sex differences in the incidence and progression of many liver diseases, including liver  
33 fibrosis and hepatocellular carcinoma, are associated with sex-biased expression of hundreds of  
34 genes in the liver. This sexual dimorphism is largely determined by the sex-specific pattern of pituitary  
35 growth hormone secretion, which controls a transcriptional regulatory network operative in the context  
36 of sex-biased chromatin states. Histone H3K27-trimethylation yields a major sex-biased repressive  
37 chromatin mark that is specifically deposited by polycomb repressive complex-2, via its homologous  
38 catalytic subunits Ezh1 and Ezh2, at many strongly female-biased genes in male mouse liver, but not  
39 at male-biased genes in female liver. Results: We used *Ezh1*-knockout mice with a hepatocyte-  
40 specific knockout of *Ezh2* to elucidate the sex bias of liver H3K27-trimethylation and its functional role  
41 in regulating sex-differences in the liver. Combined hepatic Ezh1/Ezh2 deficiency led to a significant  
42 loss of sex-biased gene expression, particularly in male liver, where many female-biased genes  
43 increased in expression while male-biased genes showed decreased expression. The associated loss  
44 of H3K27me3 marks, and increases in the active enhancer marks H3K27ac and H3K4me1, were also  
45 more pronounced in male liver. Many genes linked to liver fibrosis and hepatocellular carcinoma were  
46 induced in Ezh1/Ezh2-deficient livers, which may contribute to the increased sensitivity of these mice  
47 to hepatotoxin-induced liver pathology. Conclusions: Ezh1/Ezh2-catalyzed H3K27-trimethylation is  
48 thus essential for the sex-dependent epigenetic regulation of liver chromatin states controlling  
49 phenotypic sex differences in liver metabolism and liver fibrosis, and may be a critical determinant of  
50 the sex-bias in liver disease susceptibility.

51

## 52 **Background**

53 Liver disease shows marked sex differences. Hepatocellular carcinoma incidence and mortality is  
54 three times higher in men than in women [1, 2], and male mice are more susceptible to chemical-  
55 induced hepatic carcinogenesis [3]. Males are also more susceptible to non-alcoholic fatty liver  
56 disease, non-alcoholic steatohepatitis and liver fibrosis than females [4-8]. Underlying these sex-biased  
57 phenotypical differences are hundreds of genes expressed in liver in a sexually dimorphic manner.  
58 This dimorphism is largely regulated by the sex-specific patterns of pituitary secretion of growth  
59 hormone (GH), which is intermittent (pulsatile) in males and persistent (near continuous) in females  
60 [9]. The sex-specific effects of GH require the GH-activated transcription factor STAT5b [10, 11].  
61 STAT5b cooperates with several sex-biased, GH-responsive transcription factors [12, 13] to regulate  
62 sex-specific liver gene expression, working in the context of sex-biased long non-coding RNAs [14,  
63 15], microRNAs [16], and sex-biased chromatin states [17-19]. Trimethylation of histone H3 at lysine  
64 27 (H3K27me3) has been identified as a sex-biased chromatin mark in mouse liver, where a striking  
65 male bias in the density of H3K27me3 marks is seen across many of the most highly female-biased  
66 genes in male liver, but not at male-biased genes in female liver [17]. Continuous infusion of male  
67 mice with GH, which overrides endogenous male plasma GH pulses and imposes a female-like  
68 hormonal environment, depletes hepatic H3K27me3 marks at highly female-biased genes in  
69 association with induction of female-biased gene expression [19]. These findings suggest that GH  
70 regulation of H3K27me3 levels at sex-specific genes contributes functionally to sex differences in liver  
71 gene expression and function.

72  
73 H3K27me3, a hallmark of transcriptional silencing, is deposited by polycomb repressive complex-2  
74 (PRC2), a protein complex involved in cell differentiation, cell-specific identity and cell proliferation  
75 [20, 21]. PRC2 has three core components, Suz12, Eed and the homologous catalytic subunits Ezh1  
76 and Ezh2. Ezh1 and Ezh2 both contain a SET domain, which is required for methylation of histone H3  
77 lysine-27. PRC2 can also facilitate transcriptional repression by recruiting protein complexes that  
78 recognize H3K27me3 and induce chromatin compaction [22]. Ezh1 and Ezh2 have complementary

79 and compensatory functions and share an overlapping set of target genes [23, 24]. Ezh2 is more  
80 active as a methyltransferase than Ezh1 and is preferentially expressed in embryonic and highly  
81 proliferative tissues, unlike Ezh1, whose expression persists in adult tissues [23]. Liver size and  
82 hepatic progenitor cell expansion are significantly reduced upon deletion of the SET domain of Ezh2  
83 in embryonic mouse liver, which impairs liver differentiation and maturation [25].

84  
85 PRC2 represses the expression of tumor suppressor genes through both H3K27me3-dependent and  
86 H3K27me3-independent mechanisms, promoting tumor formation [26, 27]. Increased levels of Ezh2  
87 and H3K27me3 are found in hepatocellular carcinoma (HCC) and are associated with metastasis and  
88 poor prognosis [28]. Ezh2 silences several tumor suppressor miRNAs that are down-regulated in liver  
89 cancer [27] and it interacts with highly expressed oncogenic long non-coding RNAs (lncRNAs) to  
90 repress target genes in HCC [29, 30]. However, Ezh1 and Ezh2 can also exert anti-tumor effects [31,  
91 32]. Notably, the beneficial effects of Ezh1 and Ezh2 are apparent in adult mouse liver, where the  
92 functional loss of both genes induces gene dysregulation accompanied by a severe decrease in liver  
93 function, impaired liver regeneration, and induction of liver fibrosis [33], which often leads to  
94 development of HCC [34]. Liver steatosis, fibrosis and HCC development are also induced by  
95 disruption of GH-STAT5 signaling in mouse liver [35-38], where the metabolic effects of GH signaling  
96 loss linked to fatty liver development are more pronounced in males than females [39]. Based on  
97 these findings, the sex-dependent pathologies seen in GH signaling-disrupted liver, could, in part,  
98 involve the loss of GH-regulated and Ezh1/Ezh2-dependent deposition of H3K27me3 marks required  
99 for physiologically balanced expression of sex-biased genes in the liver.

100

101 Here, we use an *Ezh1*-knockout mouse model with a hepatocyte-specific knockout of *Ezh2* to  
102 investigate the role of H3K27me3 in regulating sex-biased gene expression in mouse liver and the  
103 potential impact of this regulation on sex-biased susceptibility to liver disease. Our findings reveal a  
104 significant sex-bias in the impact of Ezh1/Ezh2 loss, with a striking preference for depletion of  
105 H3K27me3 marks and increased expression of female-biased genes in Ezh1/Ezh2-deficient male

106 liver. Hepatic Ezh1/Ezh2 deficiency is also shown to down regulate many male-biased genes,  
107 presumed as a secondary response to the disruption of female-biased gene expression. Finally, we  
108 show that many genes associated with liver fibrosis and liver carcinogenesis are differentially  
109 responsive to the loss of Ezh1/Ezh2 in male compared to female liver, which may contribute to the  
110 observed sex-differences in the incidence and progression of liver cancer.

111

## 112 **Methods**

113 **Animal tissues.** Livers from 7-week-old male and female *Ezh1*-knockout mice with a hepatocyte-  
114 specific knockout of *Ezh2* (E1/E2-KO mice, also designated Double-knockout (DKO) in the figures  
115 and tables) and their age and sex matched floxed littermate controls were generated as described  
116 [33]. Briefly, *Ezh2*<sup>fl/fl</sup> mice [40] were bred with Alb-Cre transgenic mice [41]; their offspring were then  
117 bred with *Ezh1*-knockout mice (Thomas Jenuwein, Research Institute of Molecular Pathology, Vienna,  
118 Austria) [42] to generate E1/E2-KO mice. Livers from 2-8 week old male and female CD1 mice (ICR  
119 strain) were those described previously [43]. Hypophysectomy and continuous GH infusion of male  
120 mice for 14 d using an Alzet osmotic minipump were performed as described [19, 44]. Livers used in  
121 this study were obtained from mice housed and handled according to NIH guidelines, and all animal  
122 experiments were approved by the Animal Care and Use Committee of National Institute of Diabetes  
123 and Digestive and Kidney Diseases.

124

125 **qPCR analysis.** Liver total RNA (1 µg) was reverse transcribed using the Applied Biosystems High-  
126 Capacity cDNA Reverse Transcription Kit (Fisher, Cat#43-688-14). qPCR was performed using Power  
127 SYBR green PCR master mix and processed on an ABS 7900HT sequence detection system (Applied  
128 Biosystems) or the CFX384 Touch Real-Time PCR detection system (Bio-Rad). For RT-qPCR, raw Ct  
129 values were analyzed using the comparative Ct method with normalization to the 18S RNA content of  
130 each sample. Primers used for qPCR are shown in Table S1A.

131

132 **RNA-seq analysis.** Approximately 10% of each liver was snap frozen in liquid nitrogen and used to  
133 extract RNA with TRIzol reagent (Invitrogen Life Technologies Inc., Carlsbad, CA). Total liver RNA  
134 was isolated from each of 9 individual mouse livers per treatment group (Male (floxed) controls,  
135 Female (floxed) controls, Male E1/E2-KO and Female E1/E2-KO). Three RNA-seq libraries (biological  
136 replicates) were prepared for each treatment group; each sequencing library was comprised of a pool  
137 of RNAs obtained from n=3 individual livers. Sequencing libraries were prepared using the Illumina  
138 TruSeq RNA library preparation kit (Illumina, cat# RS-122-2001) and 68 nt single-end sequence reads  
139 were obtained on an Illumina HiSeq instrument. RNA-seq data was analyzed using a custom pipeline  
140 [44]. Briefly, sequence reads were aligned to mouse genome build mm9 (NCBI 37) using Tophat  
141 (version 2.0.13) [45]. FeatureCounts [46] was used to count sequence reads mapping to the union of  
142 the exonic regions in all isoforms of a given gene (collapsed exon counting), and differential  
143 expression analysis was conducted using the Bioconductor package EdgeR [47]. We identified 11,491  
144 liver-expressed genes, defined as genes expressed at >1 FPKM (Fragments Per Kilobase length of  
145 transcript per Million mapped reads) in at least one of the four sex-genotypes analyzed. 1,356 liver-  
146 expressed genes were significantly dysregulated in either male or female E1/E2-KO liver [i.e., EdgeR  
147 |fold-change| > 1.5 and adjusted p-value (i.e., FDR, false discovery rate) < 0.05 for a comparison of  
148 E1/E2-KO male vs control male liver, or for a comparison of E1/E2-KO female vs control female liver].  
149 A set of 1,131 genes showing significant male-female differences in expression in livers of floxed  
150 control mice in the E1/E2-KO background strain was identified using cutoff values for sex-differential  
151 expression of FDR < 0.01 and FPKM >1; these thresholds empirically corresponded to a >1.2-fold  
152 sex-difference in expression (Table S2). A set of 8,021 liver-expressed genes whose expression is  
153 stringently sex-independent was defined based on |fold-change| for sex-difference < 1.2 and FDR >  
154 0.1 (Table S3). The responses of these genes to the loss of Ezh1/Ezh2 are shown in Table S2 and  
155 Table S3, and are summarized in Table S4.

156  
157 Differential expression data from livers of male mice treated with GH given as a continuous infusion  
158 for 14 d, and for livers of hypophysectomized male and female mice, and their strain and age matched

159 pituitary-intact control livers were obtained from Table S2 and Table S3 of [19] and from Table S3 of  
160 [44]. A set of 113 robust female-biased liver-expressed genes was defined as genes with a  
161 female/male expression ratio > 2-fold in control mice from each of three different mouse models  
162 (Table S5). Raw RNA-seq data from GSE53627 [33] was obtained and re-analyzed using the custom  
163 pipeline cited above. Differential expression analysis was performed for the following comparisons:  
164 E1/E2-KO males vs. control males (8 months); males treated with CCl<sub>4</sub> vs. control males; and E1/E2-  
165 KO-males treated with CCl<sub>4</sub> vs. control males (Table S7, Table S8).

166  
167 For female-biased genes, a percent feminization value was calculated based on each gene's  
168 response to each of the following treatments: Ezh1/Ezh2 loss in male liver; pituitary hormone ablation,  
169 as determined by hypophysectomy of male mice; and continuous infusion of male mice with GH for 14  
170 days, as follows:

$$171 \quad \% \text{ feminization} = \frac{100\% [\text{FPKM} (\text{treated male}) - \text{FPKM} (\text{control male})]}{172 \quad [\text{FPKM} (\text{control female}) - \text{FPKM} (\text{control male})]}.$$

173 Heat map generation and clustering were carried out using Morpheus  
174 (<https://software.broadinstitute.org/morpheus/>), with average linkage hierarchical clustering  
175 implemented on the rows.

176  
177 **Chromatin preparation and chromatin immunoprecipitation (ChIP).** Chromatin was extracted  
178 from frozen liver tissue from each of 6 individual mice per group. Approximately 1 g of frozen liver was  
179 submerged in 4 ml of cross-linking buffer [10 mM HEPES (pH 7.6), 25 mM KCl, 0.34 M sucrose, 0.15  
180 mM 2-mercaptoethanol, 2 mM MgCl<sub>2</sub>, and Pierce protease inhibitor (1 tablet per 50 mL of buffer;  
181 ThermoFisher Scientific, cat. #A32965)] and homogenized using a glass dounce homogenizer. The  
182 homogenate was pushed thorough to a 70-micron cell strainer (Fisher Scientific. #22-363-548) using  
183 a 3 ml syringe plunger. The full volume (~ 5 ml) was transferred to a 15 ml conical tube containing 313  
184 µl from a 16% formaldehyde ampule (ThermoFisher Scientific # 28906) mixed with 687 µl of  
185 crosslinking buffer, to give a final concentration of 0.83%. The samples were then incubated on a

186 rocker for 5 min at room temperature. Cross-linking was halted by addition of 250  $\mu$ l of a 2.5 M glycine  
187 (pH 8.0) solution (final concentration, 0.1 M), followed by incubation for 5 min at room temperature.  
188 Samples were pelleted (2,500 g for 5 min at 4°C) and washed twice with 10 ml of PBS. Pellets were  
189 resuspended in 10 ml of Lysis Buffer 1 [50 mM HEPES (pH 7.5), 140 mM NaCl, 1 mM EDTA, 10%  
190 glycerol, 0.5% IGEPAL CA-630 (Sigma-Aldrich, cat. #I8896), 0.25% Triton X-100 (Sigma cat. #T8787)  
191 and Pierce protease inhibitor, as above], and incubated on a rocker for 10 min at 4°C. Samples were  
192 centrifuged at 2,000 g at 4°C for 5 min, the supernatant was removed, and the pellet was  
193 resuspended in 10 ml of Lysis buffer 2 [200 mM NaCl, 1 mM EDTA, 0.5 mM EGTA, 10 mM Tris-HCl  
194 (pH 8.0) and Pierce protease inhibitor] and rocked for 5 min at 4°C. Samples were centrifuged at  
195 2,000 g at 4°C for 5 min, the supernatant was removed, and the pellet was resuspended in 2 ml of 1X  
196 radioimmunoprecipitation assay (RIPA) buffer [50 mM Tris-HCl (pH 8.1), 150 mM NaCl, 1% IGEPAL  
197 CA-630, 0.5% sodium deoxycholate] containing 0.5% SDS and Pierce protease inhibitor. Samples  
198 were sonicated for 20 cycles (30 s ON, 30 s OFF) using a Bioruptor Pico sonicator (Diagenode) in 15  
199 ml Diagenode TPX tubes containing 0.3 ml polypropylene beads. A 15  $\mu$ l aliquot of the sonicated  
200 chromatin was incubated at 65°C for 6 hr to reverse cross-links. RNase A (ThermoFisher E053, 10  
201 mg/mL) was added to a final concentration of 0.12 mg/mL and the samples then incubated at 37°C for  
202 30 min. Proteinase K (Bioline BIO-37084, 20 mg/mL) was added to a final concentration of 0.39  
203 mg/mL and samples were digested at 37°C for 2 h. A portion (8  $\mu$ l) of each sample was analyzed by  
204 electrophoresis on a 1% agarose gel to size the DNA fragments, which mostly ranged from 100 to 300  
205 bp. Reversed cross-linked DNA was quantified using a Quant-iT PicoGreen assay kit (Invitrogen). The  
206 remaining sonicated chromatin was snap-frozen in liquid nitrogen and stored at -80°C until further use  
207 for ChIP. ChIP was performed as reported previously [17, 18] using the following ChIP-validated  
208 antibodies: H3K27ac (Abcam cat. # ab4729, 3  $\mu$ g antibody per 15  $\mu$ g of sonicated chromatin),  
209 H3K4me1 (Abcam cat. # ab8895, 1.2  $\mu$ g antibody per 15  $\mu$ g of sonicated chromatin), H3K27me3  
210 (Abcam cat. # ab6002, 2  $\mu$ g antibody per 10  $\mu$ g of sonicated chromatin), and normal rabbit IgG (Santa  
211 Cruz, cat. # sc-2027, 3  $\mu$ g antibody per 15  $\mu$ g of sonicated chromatin). ChIP DNA was quantified  
212 using a Quant-iT PicoGreen assay kit (Invitrogen) and analyzed by quantitative PCR (qPCR) using



213 primers that interrogate genomic regions selected as positive controls or as negative controls for each  
214 of the histone marks based on our published ChIP-seq data [17].

215

216 **ChIP sequencing.** Sequencing libraries were prepared for each of the above three histone marks  
217 using 20-50 ng of ChIP'd DNA. Libraries were prepared for each of 4 individual livers (biological  
218 replicates) for each sex and each genotype (male and female floxed control mice, and male and  
219 female E1/E2-KO mice; 16 libraries for each histone mark) using NEBNext Ultra II DNA Library Prep  
220 kit for Illumina (NEB, cat. # E7645). NEBNext Multiplex Oligos for Illumina (NEB, Set 1; cat. # E7335,  
221 NEB, Set 2; cat. # E7500) were used for multiplexing. The Agencourt AMPure XP system (Beckman  
222 Coulter, cat. # A63880) was used for sample and library purification. 50 nt paired-end sequence reads  
223 were obtained on an Illumina HiSeq instrument. ChIP-seq analysis was performed using a custom  
224 analysis pipeline initially developed for DNase-seq analysis and described elsewhere [48]. Individual  
225 biological replicates were validated using standard quality control metrics (FASTQC reports,  
226 confirmation of read length, and absence of read strand bias). FASTQ files for validated biological  
227 replicates were then concatenated to obtain a single set of combined reads for each condition.  
228 Sequence reads were mapped to the genome using Bowtie 2 (version 2.3.2) [49]. Genomic regions  
229 containing a significant number of H3K27me3 reads were identified using SICER (version 1.1, window  
230 size 400 bp and gap size 2400 bp) [50] and used for Reads in Peaks Per Million mapped sequence  
231 reads (RiPPM) normalization for UCSC browser visualization, as described below. Genomic regions  
232 (peaks) enriched for H3K27ac and H3K4me1 sequence reads were discovered using MACS2 (version  
233 2.1.1) [51] with default parameters. ChIP-seq peaks were visualized in the UCSC genome browser  
234 (<https://genome.ucsc.edu/>) after normalization of the genomic regions (i.e., ChIP-seq peak regions)  
235 discovered by SICER or MACS2 using RiPPM as a scaling factor, as follows. The peak lists identified  
236 for each sample (described above) were merged using mergeBed (BEDtools) to generate a single  
237 peak list (peak union). The fraction of reads in the peak union list for each sample was then calculated  
238 to obtain a scaling factor. Raw read counts were divided by the per-million scaling factor to obtain  
239 RiPPM normalized read counts.

240

241 **H3K27me3 differential peak discovery.** DiffReps (version 1.55.4) [52] was used to identify genomic  
242 regions where H3K27me3 reads showed a significant difference in intensity between conditions being  
243 compared ('differential sites'). These analyses were based on pairwise comparisons of the 4 biological  
244 replicates per experimental group for each of the following comparisons: control males vs. control  
245 females; E1/E2-KO males vs. control males; E1/E2-KO females vs. control females; and E1/E2-KO  
246 males vs. E1/E2-KO females. diffReps differential windows were discovered using the nsd broad  
247 option of diffReps using each of four window sizes: 1 kb, 2 kb, 5 kb and 10 kb. For each analysis, the  
248 step size was set to 1/10 of the window size. Default statistical testing parameters of diffReps were  
249 used: negative binomial test with a p-value cutoff of  $< 0.0001$  for significant windows. Windows with  
250 significant differential H3K27me3 marks that were discovered with two or more of the window size  
251 settings were consolidated to eliminate redundancy by retaining the diffReps ID number and statistical  
252 information for the largest window size setting. Differential windows that were uniquely discovered by  
253 any of the four window size settings were also retained. The combined set of retained H3K27me3  
254 differential windows were then filtered by diffReps-determined by  $FDR < 0.05$  and  $|\text{fold-change}| > 2$  for  
255 the experiments groups being compared. The final lists of H3K27me3 differential sites are shown in  
256 Tables S6A-S6D.

257

258 **H3K27ac and H3K4me1 differential peak discovery.** DiffReps (see above) was then applied using  
259 the  $n=4$  biological replicate ChIP-seq samples for each chromatin mark, using the 1 kb window setting  
260 to identify diffReps differential sites. The differential sites identified were then filtered to retain those  
261 sites that overlap a MACS2-identified ChIP-seq peak. The resulting list of retained differential sites  
262 was further filtered for downstream analyses by excluding those sites that did not meet the threshold  
263 values of diffReps-determined  $FDR < 0.05$  and  $|\text{fold-change}| > 2$  for the experimental groups being  
264 compared. The final lists of H3K27ac differential sites are shown in Tables S6E-S6H, and the final lists  
265 of H3K4me1 differential sites are shown in Tables S6I-S6L.

266

267 **H3K27me3 peak normalization.** Due to the semi-quantitative nature of ChIP-seq methodologies [53],  
268 we first identified H3K27me3 regions that are largely unchanged across individuals and genotypes  
269 (static H3K27me3 sites). We used diffReps to identify stringent non-differential genomic windows (p-  
270 value > 0.1 and |fold-change| < 1.2) in the comparison of control male and E1/E2-KO male livers, and  
271 in the comparison of control female and E1/E2-KO female livers. The non-differential H3K27me3 sites  
272 identified in male liver were intersected with those identified in female liver, and 1,433 sites with 80%  
273 or greater reciprocal overlap across their lengths were retained. Those sites were then filtered by their  
274 average raw sequence read counts, and the top 35% of sites (502 sites, >400 average raw sequence  
275 reads per site) were retained. Those 502 sites were further filtered to retain the top 75% sites whose  
276 H3K27me3 marks were least variant across samples after RPM normalization (376 sites). ChIP-qPCR  
277 analysis of a subset of these stringent non-differential H3K27me3 sites (see Fig. 4A, Fig. 4B, below;  
278 and Fig. S3, below; primers used for qPCR are shown in Table S1B) confirmed that this approach  
279 does indeed identify invariant sites. ChIP-qPCR also revealed moderate compression of the strong  
280 differential sites in the ChIP-seq data, as expected. Next, we calculated the fraction of total sequence  
281 reads found in these 376 sites for each sample to obtain a scaling factor. Raw sequence read counts  
282 were divided by the per-million scaling factor to obtain normalized read counts for each sample. The  
283 normalization factor was then used to provisionally override the diffReps normalization results, and  
284 thereby obtain a new set of differential sites for each comparison. We observed high overlap (~93%)  
285 between the differential sites identified using the standard diffReps parameters, described above, and  
286 those identified when using the stringent non-differential site peak-based normalization factors,  
287 described in this paragraph. This high overlap validated our decision to use the standard diffReps  
288 normalization method to identify H3K27me3 differential sites for all downstream analyses.

289  
290 **Mapping chromatin marks to genes.** We used the output of diffReps to annotate and assign each  
291 H3K27me3 differential site (see above) to one of the following categories and to the genes associated  
292 with them: ProximalPromoter (site within 0.25 kb of a transcription start site (TSS)), Promoter1k (site  
293 within 1 kb of a TSS), Promoter3k (site within 3 kb of a TSS), Genebody (site overlaps the genomic

294 region extending from a gene's promoter to 1 kb downstream of the gene's transcript end site (TES)),  
295 Genedesert (genomic regions that are depleted of genes and are at least 1 megabase long),  
296 Pericentromere (region between the boundary of a centromere and the closest gene, excluding the  
297 proximal 10 kb of the gene's regulatory region), Subtelomere (defined in a manner similar to  
298 pericentromere), and OtherIntergenic (any region that does not belong to any of the above categories)  
299 (Table S6A-S6D). H3K27me3 differential sites annotated as ProximalPromoter, Promoter1k,  
300 Promoter3k and Genebody, and the genes associated to them, were used for downstream analyses in  
301 Fig. 5, below. H3K27ac and H3K4me1 differential sites were mapped to their putative gene targets by  
302 GREAT [54] using the following parameters: each RefSeq gene was assigned a basal regulatory  
303 domain extending from 5 kb upstream to 1 kb downstream of the TSS, and the regulatory domain was  
304 extended in both directions to the nearest gene's basal regulatory domain up to a maximum of 1,000  
305 kb in one direction [54]. For the results presented in Fig. 6, below, genes that were up-regulated in  
306 male E1/E2-KO livers (846 genes) were classified into 8 groups (Table S6M) based on the GREAT  
307 gene-mark associations and the overlap of the full H3K27me3 region with the gene body or with the 3  
308 kb genomic region surrounding the gene's TSS. Of the 846 genes, 226 are stringent sex-independent  
309 and 260 are sex-biased (Table S6M). The group classifications for these subsets of genes are shown  
310 in Fig. 6C.

311  
312 **Functional annotation and Pathway Analysis.** Differential gene expression data were analyzed  
313 using the IPA software suite ([https://www.qiagenbioinformatics.com/products/ingenuitypathway-](https://www.qiagenbioinformatics.com/products/ingenuitypathway-analysis)  
314 [analysis](https://www.qiagenbioinformatics.com/products/ingenuitypathway-analysis)) (QIAGEN Inc). Genes related to liver fibrosis and hepatocellular carcinoma were obtained by  
315 searching for the terms "liver fibrosis" and "Hepatocellular carcinoma" in the Diseases and Functions  
316 search field. Lists output by IPA were further filtered to exclude chemicals by retaining only terms with  
317 an associated Entrez gene ID for mouse. Lists of 217 fibrosis-related genes and 920 hepatocellular  
318 carcinoma-related genes used in our analysis are shown in Table S7 and Table S8.

319

320 **Statistical analysis.** The enrichment for up regulation of sex-biased genes in E1/E2-KO liver as  
321 compared to non-sex-biased genes was calculated from the ratio (A/B) divided by (C/D), as shown in  
322 this example: A = 240 female-biased genes up-regulated in male E1/E2-KO liver, and B = 842 *minus*  
323 240 = 602 non-female-biased genes up-regulated in male E1/E2-KO liver, where 842 = total number  
324 of liver-expressed genes up-regulated in male E1/E2-KO liver; and C = 404 female-biased genes not  
325 up-regulated in male E1/E2-KO liver, and D = 10,847 liver-expressed genes not up-regulated in male  
326 E1/E2-KO liver (11,491 total liver-expressed genes *minus* 644 total female-biased genes). In this  
327 case, (A/B) divided by (C/D) = 10.7-fold enrichment Fisher exact test was used to determine the  
328 statistical significance of all the enrichment and depletion calculations (Table S11). Graphical and  
329 statistical analyses were performed using GraphPad Prism 7 software. qPCR data are expressed as  
330 mean values and either standard errors of the mean or standard deviation for n = 3 to 12 individual  
331 mouse livers per group, as specified in each figure legend. Unpaired t-test or one-way analysis of  
332 variance (ANOVA) with a Dunnett posttest was used to compare groups to each other, as noted in the  
333 figure legends.

334  
335 **Data availability.** All raw and processed RNA-seq and ChIP-seq data for 7-week floxed control and  
336 E1/E2-KO mice are available under accession number GSE110934 at Gene Expression Omnibus  
337 (<https://www.ncbi.nlm.nih.gov/gds/>). RNA-seq data for CCl<sub>4</sub>-treated control and E1/E2-KO male  
338 mouse livers, and for 8-month control and E1/E2-KO male mouse livers [33] are available under  
339 accession number GSE53627.

340

## 341 **Results**

342 **Sex-independent expression of *Ezh1* and *Ezh2* expression in mouse liver** – We examined the  
343 expression of *Ezh1* and *Ezh2* in male and female mouse liver from 2 to 8 weeks of age (Fig. 1A). *Ezh1*  
344 levels did not change significantly over the postnatal liver developmental period examined. *Ezh2*  
345 expression peaked at 2 weeks, when hepatocytes are still proliferating [55], and then progressively  
346 declined with age in both sexes. This is consistent with the preferential expression of *Ezh2* in highly

347 proliferative cells and with its decline in postnatal development seen in other mouse tissues [23]. No  
348 significant sex-bias in liver expression of either *Ezh1* or *Ezh2* was seen at any of the ages examined.  
349 *Ezh1* but not *Ezh2* mRNA levels were greatly reduced in both male and female livers of 7-week-old  
350 *Ezh1*-knockout mice with hepatocyte-specific inactivation of *Ezh2* (E1/E2-KO livers) (Fig. 1B, Fig. 1C).  
351 However, for both *Ezh* genes, transcription was abolished from the exons encoding the SET domain  
352 (Fig. 1B, *red box*), which is essential for histone H3K27 methyltransferase activity [24].

353

354 **Female-biased genes are preferentially de-repressed in Ezh1/Ezh2-deficient male liver** – RNA-  
355 seq revealed that 1,355 (12%) of 11,491 liver-expressed genes are differentially expressed between  
356 E1/E2-KO and control mouse liver. A majority (72%) of the differentially expressed genes were up-  
357 regulated in the absence of Ezh1 and Ezh2, as is expected for a genetic deficiency in the capacity for  
358 Ezh1/Ezh2-mediated deposition of repressive chromatin marks. More genes showed dysregulated  
359 expression in E1/E2-KO males than in E1/E2-KO females (Table S4A). Sex-biased genes comprised  
360 38% of the genes dysregulated in E1/E2-KO liver (435 of 1,131 sex-biased genes; Fig. 2A, Table  
361 S4B), and were strongly enriched in both the up-regulated gene set (ES = 9.4,  $p < 2.2E-16$ ) and the  
362 down-regulated gene set (ES = 8.9,  $p < 2.2E-16$ ) when compared to a set of stringently-sex-  
363 independent genes that responded to E1/E2-KO in either sex (Fig. 2A; 413 of 8,021 such genes;  
364 Table S4C).

365

366 H3K27me3 was previously identified as a major sex-biased repressive mark: it is found at many highly  
367 female-biased genes in male liver, but not at highly male-biased genes in female liver [17]. Consistent  
368 with that finding, many female-biased genes were up-regulated (de-repressed) in E1/E2-KO male liver,  
369 while few male-biased genes were up-regulated in E1/E2-KO female liver (Fig. 2B). Further, 154 of  
370 250 up-regulated female-biased genes were exclusively up-regulated in male E1/E2-KO liver, whereas  
371 only 10 genes were exclusively up-regulated in female E1/E2-KO liver (Fig. 2C, *top left*). Overall,  
372 genes up-regulated in E1/E2-KO male liver were strongly enriched for female-biased genes (ES =  
373 10.1,  $p < 2.2E-16$ ) compared to all liver-expressed genes. Further, there was a significant enrichment

374 of male-biased genes in the set of genes down-regulated in E1/E2-KO male liver ( $ES = 16.9$ ,  $p < 2.2E-$   
375  $16$ ), and a modest enrichment of female-biased genes in the set of down-regulated in E1/E2-KO  
376 female liver ( $ES = 2.8$ ,  $p = 5.7E-07$ ) (Fig. 2C; also see Table S4). Thus, the loss of Ezh1/Ezh2  
377 preferentially alters sex-biased gene expression in male liver, where many female-biased genes are  
378 induced (de-repressed) and male-biased genes are down-regulated. Stringently sex-independent  
379 genes did not show a significant sex bias in their response to E1/E2-KO (Fig. 2C, *bottom*).

380  
381 A majority of all E1/E2-KO-responsive female-biased genes (191 of 294 genes; 65%) lose sex-  
382 specificity in the absence of Ezh1/Ezh2 (Fig. 2D), primarily due to their up regulation in male liver.  
383 Further, 64 of 146 (44%) E1/E2-KO-responsive male-biased genes lose sex-specificity, primarily due  
384 to their down regulation in male E1/E2-KO liver (Fig. 2D; Table S2, column U). The dysregulation of  
385 sex-biased genes in E1/E2-KO mouse liver can also be seen by comparing overall gene expression  
386 sex ratios in E1/E2-KO liver to control liver (Fig. 2E) and in a heat map (Fig. S1, decrease in color  
387 intensity for many genes; column 4 vs. column 1). Whereas the loss of H3K27me3-based repression  
388 can directly explain the increased expression of female-biased genes in E1/E2-KO male liver, the  
389 decrease in male-biased gene expression is likely a secondary response to E1/E2-KO. This response  
390 may involve CUX2, a female-specific repressor of many male-biased genes [12, 56] that is induced  
391 3.7-fold in male E1/E2-KO liver, insofar as 27% of the male-biased genes down-regulated in E1/E2-  
392 KO male mouse liver are direct targets of CUX2 (Table S2).

393  
394 The female-biased genes up-regulated in male E1/E2-KO liver include many cytochromes P450 (*Cyp*  
395 genes), sulfotransferases (*Sult* genes) and other drug metabolizing enzymes genes. Interestingly,  
396 while female-biased *Cyp2* family members (*Cyp2b9*, *Cyp2c69*, *Cyp2c40*), were strongly de-repressed  
397 in E1/E2-KO male liver, two female-biased *Cyp3* family members were strongly induced in E1/E2-KO  
398 female but not E1/E2-KO male liver (*Cyp3a16*, 36-fold increase; *Cyp3a41a*, 4-fold increase),  
399 increasing their female-bias in the absence of Ezh1/Ezh2. Several other highly female-biased genes,  
400 including *Sult2a1*, *Ntrk2*, *Ptgds*, *A1bg* and *Cyp3a44*, were strongly induced upon loss of Ezh1/Ezh2 in

401 both male and female liver (Table S2, Fig. S2).

402

403 **Relationship between GH regulation and Ezh1/Ezh2 repression of female-biased genes in male**

404 **liver** – Hypophysectomy, which ablates circulating pituitary hormones, abolishes ~90% of liver sex  
405 differences, and exogenous GH given either in pulses (male plasma GH pattern) or continuously  
406 (female-like GH pattern) substantially restores the corresponding sex-specific patterns of liver gene  
407 expression [57, 58]. Furthermore, GH given to intact male mice as a continuous infusion feminizes  
408 liver gene expression by inducing many female-biased genes and repressing male-biased genes. The  
409 induction of female-biased genes by continuous GH is associated with the loss of H3K27me3 marks in  
410 male liver, as was shown for four highly female-biased genes [19]. Here, we compared gene  
411 responses to Ezh1/Ezh2 loss to gene responses following hypophysectomy [44] or after continuous  
412 GH infusion for 14 days in male liver [19] to better understand the relationship between H3K27me3-  
413 based repression of female-biased genes and regulation by the sex-specific patterns of GH secretion.

414

415 Loss of Ezh1/Ezh2 partially feminized the expression of a subset of strongly female-biased genes in  
416 male liver, as exemplified by the strong, albeit incomplete up regulation of *Cyp2b9* – but not *Fmo3* – in  
417 male E1/E2-KO liver (Fig. 3A). *Cyp2b9* and *Fmo3* represent two distinct classes of female-biased  
418 genes, which were previously defined based on their responses to hypophysectomy. Class I female-  
419 biased genes, such as *Fmo3*, require the female, near continuous plasma GH pattern for full  
420 expression; consequently, Class I female genes are repressed in female liver by hypophysectomy. In  
421 contrast, Class II female-biased genes, such as *Cyp2b9*, are repressed in male liver by the male  
422 pituitary hormone profile; consequently, they are de-repressed (i.e., induced) in male liver following  
423 hypophysectomy [44, 57]. *Cyp2b9* and *Fmo3* both have strongly male-biased H3K27me3 marks  
424 across their gene bodies, which are lost in Ezh1/Ezh2 deficient liver (Fig. 4C). Nevertheless, only  
425 *Cyp2b9* is depressed in the absence of Ezh1/Ezh2 (Fig. 3A). The distinct responses of these genes to  
426 Ezh1/Ezh2 loss raised the possibility that Ezh1/Ezh2-catalyzed deposition of H3K27me3 marks serves  
427 as the underlying mechanism for Class II female-biased gene repression in male liver. However,



428 inconsistent with this proposal, we found that many Class I female-biased genes are also de-  
429 repressed in E1/E2-KO male liver, and at a frequency that matches their overall representation in the  
430 full set of female-biased genes (Fig. 3B, *top vs. bottom*).

431

432 To better understand the GH-dependence of E1/E2-KO-responsive female-biased genes, we  
433 examined a set 113 robust female-biased genes (Table S5), of which 65 (58%) are up-regulated in  
434 E1/E2-KO male liver. We assessed the responses of these 65 genes to two treatments that disrupt  
435 normal circulating GH patterns, hypophysectomy and continuous GH infusion. 55 of the 65 genes  
436 (85%) were up-regulated in livers of hypophysectomized male mice and/or in livers of male mice  
437 infused with GH continuously (Fig. 3C). In contrast, only 15% (34/223) of stringent sex-independent  
438 genes induced in E1/E2-KO male liver showed these responses. Further, expression of all but one of  
439 the 113 robust female-biased genes (*Xist*) was induced (i.e., feminized) in male liver in one of more of  
440 the three models examined (hypophysectomy, continuous GH infusion, and *Ezh1/Ezh2*-KO) (Fig. 3C,  
441 *left*). However, the extent of feminization was substantially lower upon loss of *Ezh1/Ezh2* (median  
442 feminization, 36%) than following hypophysectomy (median feminization, 102%) (Fig. 3D; Table S5).  
443 Moderately female-biased genes were often substantially feminized upon loss of *Ezh1/Ezh2* (>50%  
444 feminization), whereas the mean feminization was only 29% for highly female-biased genes ( $F/M >$   
445 10). Exceptions include *Hao2*, *Sult2a1*, *Cyp2c40* and *Cyp17a1* (Fig. 3E). Three highly female-biased  
446 sulfotransferases, *Sult2a2*, *Sult2a5* and *Sult2a6*, showed only partial feminization in all three models  
447 (Fig. 3E), despite the loss of *Ezh1/Ezh2*-dependent H3K27-trimethylation (Fig. 4C, Fig. S2B). Thus, for  
448 a subset of female-biased genes, the loss of *Ezh1/Ezh2*, and thus the capacity to form H3K27me3  
449 repressive marks in male liver, is not sufficient to de-repress gene expression. The repression of these  
450 female-biased genes in male liver likely involves mechanisms more complex than simply packaging  
451 the gene and its enhancers in H3K27me3 repressive chromatin.

452

453 **Loss of H3K27me3 marks at E1/E2-KO up-regulated female-biased genes** – Global levels of  
454 H3K27me3 are reduced in 96% of E1/E2-KO hepatocytes at 3 months of age, without effects on non-

455 parenchymal cells [33]. Here, we investigated the relationship between loss of H3K27me3 marks and  
456 the above changes in gene expression. First, to establish the validity of our sequencing results in the  
457 absence of a reference epigenome, we identified genomic regions where H3K27me3 marks were  
458 significantly lost (differential H3K27me3 sites), as well as regions where the intensity of H3K27me3  
459 marks was unchanged in E1/E2-KO liver compared to control liver (static H3K27me3 sites; see  
460 Methods). qPCR analysis of the ChIP'd DNA confirmed that significant changes in H3K27me3 mark  
461 intensity occurred at the differential sites but not at the static sites, consistent with the ChIP-seq data  
462 for the same sites (Fig. 4A vs. Fig. 4B; Fig. S3). At some differential sites, the loss of H3K27me3  
463 marks in E1/E2-KO liver indicated by sequencing was less complete than indicated by qPCR analysis  
464 of the same ChIP'd DNA samples. Thus, the ChIP-seq data underestimates the loss of H3K27me3 at  
465 some sites. Nevertheless, we were able to identify several thousand genomic regions with a significant  
466 difference in H3K27me3 marks between E1/E2-KO and control liver (Table S6B, Table S6C).

467  
468 Comparison of control male and female liver identified 538 genomic regions with male-biased  
469 H3K27me3 marks vs. only 11 regions with female-biased H3K27me3 marks (Fig. 5A, Table S6A),  
470 consistent with the strong male-bias in mouse liver H3K27me3 marks reported previously [17].  
471 Strikingly, this sex bias was abolished in E1/E2-KO liver for all 549 sex-biased H3K27me3 sites;  
472 furthermore, 63 other H3K27me3 sites acquired sex-bias in the absence of Ezh1/Ezh2 (Fig. 5A).  
473 H3K27me3 marks were decreased at a majority (76%) of the sites dysregulated in E1/E2-KO liver, as  
474 expected given the loss of Ezh1/Ezh2. Twice as many H3K27me3 sites were dysregulated in male  
475 E1/E2-KO than in female E1/E2-KO livers (2,236 vs 1,096 sites, Fig. 5B), consistent with the greater  
476 number of genes dysregulated in male liver (Fig. 2). Sites with H3K27me3 marks down-regulated in  
477 both male and female E1/E2-KO livers (male-female common sites, Fig. 5C, Fig. 5D) were enriched  
478 for female-biased genes ( $ES = 2.5$ ,  $p = 5.59E-04$ ) when compared to a background set of all liver-  
479 expressed genes. Female-biased gene enrichment was also seen for sites whose H3K27me3 marks  
480 were down-regulated only in male E1/E2-KO liver, and for sites showing down regulation only in  
481 female E1/E2-KO liver (Fig. 5E).

482

483 Unexpectedly, H3K27me3 marks were up-regulated in E1/E2-KO liver at ~24% of all H3K27me3  
484 differential sites (Fig. 5B). The extent of up regulation at these sites was similar to the extent of down  
485 regulation at other H3K27me3 differential sites (Fig. 5F). H3K27me3 sites up-regulated only in E1/E2-  
486 KO-female liver were enriched for female-biased genes (ES = 2.8,  $p = 5.38E-03$ ; Fig. 5E). The gene  
487 targets of the up-regulated H3K27me3 sites (452 genes; gene mapping based on annotations output  
488 by diffReps; see Methods) include 64 liver-expressed genes responsive to E1/E2-KO, 25 of which  
489 were repressed in either male or female E1/E2-KO liver (FDR < 0.05) (Table S6B, Table S6C). The  
490 increase in H3K27me3 marks at these sites could reflect histone mark changes in non-parenchymal  
491 cells, where the *Ezh2* gene is intact and presumably still active.

492

493 **Ezh1/Ezh2 loss is associated with gain of activating marks** – H3K27 can be modified by  
494 acetylation to form H3K27ac, an activating mark associated with active enhancers [59]. In the  
495 absence of Ezh1/Ezh2, H3K27ac marks can increase and thereby reverse PRC2-mediated gene  
496 silencing [24, 60]. ChIP-seq analysis revealed significant increases in H3K27ac and a second  
497 activating mark, H3K4me1, at ~900-1,800 sites in male and female E1/E2-KO livers compared to sex-  
498 matched control livers; decreases in these activating marks were seen at many fewer (~100-150) sites  
499 (Fig. 6A; see Table S6E-S6L for histone mark data). Thus, loss of the capacity to repress chromatin  
500 via H3K27-trimethylation is associated with an increase in activating histone marks. Further, whereas  
501 male-biased activating chromatin marks (both H3K27ac and H3K4me1) were more than twice as  
502 frequent as female-biased sites in control livers, this sex difference was abolished in E1/E2-KO livers  
503 (Fig. 6B). The overlap between the sets of sex-biased H3K27ac and H3K4me1 sites in control  
504 compared to E1/E2-KO mouse liver was low (Fig. S4), indicating that sex-biased chromatin marks are  
505 both gained and lost in Ezh1/Ezh2-deficient liver.

506

507 We mapped H3K27ac and H3K4me1 differential sites to their putative target genes using GREAT  
508 [54], and H3K27me3 differential sites were assigned to a gene if they overlapped the gene body or 3

509 kb surrounding its TSS. 846 genes up-regulated in E1/E2-KO males compared to control male liver  
510 were classified into 8 groups based on the patterns of differential histone marks associated with each  
511 gene (Table S6M). The distribution of histone mark patterns across the 8 groups was generally similar  
512 for sex-biased genes as for stringent sex-independent genes up-regulated in E1/E2-KO male livers  
513 (Fig. 6C, *top* vs. *bottom*), although groups 2-4, which have differential H3K27me3 marks, were more  
514 frequent in the sex-biased gene set, and groups 6 and 8, which have differential H3K4me1 marks but  
515 not differential K27me3 marks, were more frequent in the sex-independent gene set. A majority  
516 (~60%) of the genes up-regulated in E1/E2-KO male liver were not associated with any differential  
517 histone marks (group 1; Fig. 6C). The up regulation of these genes in the absence of changes in  
518 H3K27me3, H3K27ac or H3K4me1 marks could be due to de-repression of their transcriptional  
519 activators. For example, 13% of the sex-biased genes in group 1 (no differential chromatin marks) are  
520 direct targets of the female-specific activator of female-biased genes CUX2, whose expression  
521 increases in Ezh1/Ezh2-KO male liver in association with loss of H3K27me3 and increased H3K27ac  
522 and H3K4me1 marks (Table S6M). Genes associated with increases in H3K27ac marks, either with or  
523 without induction of K4me1 marks (groups 6 and 7), showed significantly greater up regulation than  
524 genes without any differential marks (group 1) (Fig. 6D, *top*). For female-biased genes, loss of  
525 K27me3 with or without induction of K4me1 (groups 3 and 5) resulted in greater induction of gene  
526 expression than having no associated differential marks (group 1).

527  
528 Female-biased genes de-repressed in male E1/E2-KO liver that showed both a loss of H3K27me3  
529 and a gain of H3K27ac marks had a significantly higher sex-bias than genes in other differential mark  
530 groups (Fig. 6E, *top*, group 4 vs. groups 1,2,6,7,8). Highly female-biased genes (female/male  
531 expression ratio > 10) in group 1 (no differential marks) includes *Sult2a4*, which although it is induced  
532 by > 60-fold in E1/E2-KO male liver, only reaches 17% of the expression level of control female liver.  
533 However, this group also includes *Cyp2c40* and *Cyp17a1*, whose expression was significantly  
534 feminized in E1/E2-KO male liver (51% and 58%, respectively) (Table S6M). Genes showing a gain in  
535 H3K27ac marks alone showed greater feminization than genes having no differential marks or loss of

536 K27me3 alone (Fig. 6E, bottom; group 7 vs. groups 1,3,4). Finally, 10 of 12 female-biased genes  
537 showing a loss of H3K27me3 marks and an increase in both H3K27ac and H3K4me1 marks (group 2)  
538 were fully feminized in male E1/E2-KO liver.

539

#### 540 **Ezh1/Ezh2-dependent, sex-differential regulation of liver fibrosis genes and HCC-related genes**

541 Male mice and humans are more susceptible to liver fibrosis than females [4-8] and show a male  
542 predominant incidence and progression of HCC [1, 2, 61]. Ezh1 and Ezh2 can contribute to the onset  
543 and progression of liver fibrosis, as male E1/E2-KO livers acquire a nodular appearance with portal  
544 and periportal inflammation and collagen deposition by 8 months of age, along with substantial  
545 impairment of liver function [33]. Further, E1/E2-KO male liver shows increased susceptibility to the  
546 fibrogenic and hepatotoxic effects of carbon tetrachloride (CCl<sub>4</sub>) [33]. Strikingly, almost half of all liver  
547 fibrosis-associated genes (104 of 217 genes, 48%) and HCC-related genes (425 of 920 genes, 46%)  
548 were significantly changed in expression (FDR < 0.05, |fold-change| >2) in male E1/E2-KO compared  
549 to control liver at either 7 weeks or 8 months of age, or in livers of E1/E2-KO or control livers of male  
550 mice exposed to a regimen of CCl<sub>4</sub> that induces hepatotoxicity and liver fibrosis (Fig. 7A; Table S7,  
551 Table S8).

552

553 Similar numbers of fibrosis and HCC-related genes were induced in E1/E2-KO male livers at 7 weeks  
554 of age as at 8 months (Table 1), even though no overt liver histopathological changes were apparent  
555 at 3 months of age [33]. A majority of the dysregulated genes were up-regulated (Table 1) and there  
556 was a significant increase in the degree of induction with advancing age (Fig. 7B). Livers of E1/E2-KO  
557 male mice exposed to CCl<sub>4</sub> showed the greatest number of responsive fibrosis and HCC-related  
558 genes, and the highest degree of up regulation (Table 1, Fig. 7B), consistent with a previous  
559 conclusion based on an analysis of a smaller number of genes [33]. Moreover, the dysregulated sets  
560 of 104 liver fibrosis-related genes and 425 HCC-related genes were significantly enriched for female-  
561 biased genes and depleted of stringent sex-independent genes when compared to all liver-expressed  
562 genes (Fig. 7C). More fibrosis and HCC-related genes were dysregulated in E1/E2-KO female

563 compared to E1/E2-KO male liver (Table 1), consistent with the male bias in liver disease  
564 susceptibility.

565

566 We also identified 32 sex-independent genes that are more highly up-regulated in E1/E2-KO female  
567 than E1/E2-KO male liver, and thus acquire female-biased expression in the absence of Ezh1/Ezh2  
568 (Fig. 2D, Table S9). Three genes that show the most significant up regulation are *Igf2*, the lncRNA  
569 gene *H19*, and the microRNA *miR675* (Fig. 7D). *Igf2* and *H19* are imprinted genes associated with  
570 HCC development [29, 62]. The *Igf2-H19* locus has a female-biased DNase hypersensitive site,  
571 identified previously [63], and a female-biased H3K4me1 mark that increases in female E1/E2-KO  
572 liver (Fig. 7E). Thus, while there is moderate loss of H3K27me3 marks in both sexes, female-biased  
573 increases in activating marks may explain the strong induction of these genes seen in female liver  
574 (Fig. 7E).

575

## 576 **Discussion**

577

578 Ezh1 and Ezh2 are epigenetic modifiers that catalyze H3K27-trimethylation essential for liver  
579 homeostasis and regeneration. Loss of Ezh1 and Ezh2 in hepatocytes leads to liver fibrosis, impaired  
580 liver function and increased susceptibility to the hepatotoxic effects of CCl<sub>4</sub> [33]. Marked sex  
581 differences characterize the incidence, progression and severity of these liver pathologies, however,  
582 the underlying molecular basis for these sex differences in liver disease is only partially understood  
583 [64]. Our previous work identified H3K27me3-based gene repression as a sex-biased epigenetic  
584 regulatory mechanism in mouse liver [17], suggesting that sex differences in Ezh1/Ezh2-catalyzed  
585 deposition of H3K27me3 marks may contribute to the striking differences in liver pathophysiology  
586 between the sexes. Here, we used male and female Ezh1/Ezh2 double knockout (E1/E2-KO) mice to  
587 investigate the role of Ezh1 and Ezh2 in the regulation of sex-biased genes in mouse liver, and to  
588 discover any sex-dependent effects of Ezh1/Ezh2 loss on genes associated with liver disease. We  
589 found that hepatic Ezh1/Ezh2 deficiency induces a strong, preferential dysregulation of sex-biased, as

590 compared to sex-independent, genes. Notably, many female-biased genes were significantly de-  
591 repressed in E1/E2-KO male liver, in association with the loss of H3K27me3 marks across the gene  
592 body, while comparatively few male-biased genes were correspondingly de-repressed in E1/E2-KO  
593 female liver. Rather, many male-biased genes were down-regulated in E1/E2-KO male liver, which  
594 likely is a secondary response to the up regulation of female-biased genes expression. Thus,  
595 Ezh1/Ezh2-based repression of female-biased genes is a major epigenetic regulatory mechanism  
596 controlling sex-biased gene expression in male mouse liver. We also found that Ezh1/Ezh2 deficiency  
597 up regulates many genes associated with liver fibrosis and HCC in male liver, and that these changes  
598 are seen by 7 weeks of age, which precedes the histopathological changes seen in 8-month-old mice  
599 [33]. Finally, we found that liver fibrosis- and HCC-associated genes are differentially responsive to the  
600 loss of Ezh1/Ezh2 in male compared to female liver, which may contribute to the sex differences in  
601 disease incidence and progression.

602  
603 Sex differences in liver gene expression are primarily regulated by sex-specific patterns of pituitary  
604 GH secretion. GH secretion is intermittent in males, whereas in females, pituitary GH release is more  
605 frequent, resulting in persistent stimulation of GH signaling in hepatocytes. GH-responsive liver  
606 transcription factors, including STAT5b and the STAT5-dependent repressors BCL6 [65] and CUX2  
607 [12], are key mediators of the sex-dependent transcriptional actions of GH and operate in the context  
608 of GH-regulated sex differences in chromatin accessibility [63] and sex-biased chromatin states [17].  
609 H3K27me3 is a strikingly sex-biased epigenetic regulatory factor that is specifically associated with  
610 strong repression of highly female-biased genes in male liver [17]. Consistently, female-biased genes  
611 are significantly enriched in the gene set up-regulated in E1/E2-KO male liver (Fig. 2). However, the  
612 feminization of gene expression upon loss of Ezh1/Ezh2 was, in many cases, only partial. This  
613 contrasts with the more complete feminization achieved in two other mouse models that we  
614 examined, namely, continuous infusion of GH in male mice, which overrides the male, pulsatile  
615 plasma GH pattern and induces a majority of female-biased genes within 7 days [19], and ablation of  
616 pituitary hormone secretion by hypophysectomy, which de-represses Class II female-biased genes in

617 male liver [44]. Thus, while Ezh1/Ezh2-catalyzed H3K27-trimethylation may repress female-biased  
618 genes in male liver, the loss of H3K27me3 marks alone is generally not sufficient for full gene  
619 activation, and in some cases, is largely ineffective. Thus, *Fmo3*, a highly female-specific gene  
620 (female/male liver expression ratio = 78) was not induced in E1/E2-deficient male liver, despite the  
621 extensive loss of male-biased H3K27me3 marks across the gene body (Fig. S2D). One possibility is  
622 that gene de-repression is dependent on distal enhancers, which may be subject to distinct epigenetic  
623 regulatory mechanisms. Another female-biased gene, *Cyp17a1* (female/male expression ratio = 11-  
624 fold), was substantially de-repressed in male E1/E2-KO liver (58% feminization) but showed an  
625 unexpected increase, rather than a decrease, in H3K27me3 marks in both male and female E1/E2-  
626 KO liver (Fig. S2C).

627  
628 The de-repression of female-biased gene expression in E1/E2-KO male liver was in many cases  
629 accompanied by increases in the active enhancer marks H3K27ac and H3K4me1. H3K27 acetylation  
630 cannot occur on nucleosomes where H3K27 is already trimethylated by Ezh1/Ezh2. H3K27ac marks  
631 prevent PRC2 binding, antagonize repression by PRC2 [24], and are often enriched in the absence of  
632 PRC2 [66]. These findings indicate that the increased expression of female-biased genes in E1/E2-KO  
633 male liver is likely a direct result of de-repression caused by the loss of H3K27me3 marks and the  
634 subsequent gain in H3K27ac and other activating chromatin marks. Indeed, an increase in activating  
635 marks (H3K4me1 and H3K27ac) was associated with stronger induction of gene expression (Fig. 6D  
636 top, group 6 and group 7 vs group 1).

637  
638 Our findings highlight the role of Ezh1/Ezh2-based repression of female-biased genes in male liver as  
639 an important mechanism to enforce liver sex differences. 37% of female-biased genes were  
640 significantly de-repressed in E1/E2-KO male liver (Fig. 2C), indicating that Ezh1/Ezh2 is responsible –  
641 either directly or indirectly – for a substantial fraction of the epigenetic control of female-biased genes.  
642 Further, the actions of Ezh1/Ezh2 are sex-biased, with many more genes dysregulated and more  
643 widespread loss of sites of H3K27-trimethylation occurring in male than in female liver. The absence of



644 a sex bias in liver Ezh1/Ezh2 expression (Fig. 1) indicates that other factors control the sex differential  
645 activity of Ezh1/Ezh2 in adult mouse liver. Indeed, this repression is controlled by circulating GH  
646 patterns, whose continuous infusion in male mice induces loss of H3K27me3 marks at female-biased  
647 genes in association with their widespread de-repression in male liver [19]. Little is known about the  
648 molecular mechanisms by which PRC2 complex and its Ezh1/Ezh2 catalysts are recruited to their  
649 specific chromatin targets, in general, and specifically in this case, how plasma GH patterns regulate  
650 the sex-dependent interactions between PRC2 and its female-specific gene targets. PRC2 physically  
651 associates with several long non-coding RNAs (lncRNAs) [24], which may contribute to the target  
652 gene specificity of PRC2's actions. Further studies are needed to determine whether any of the ~200  
653 liver-expressed, nuclear lncRNAs that show sex-biased and GH-regulated expression in mouse liver  
654 [15] contribute to the recruitment of PRC2 to female-biased genes repressed by Ezh1/Ezh2 in male  
655 liver.

656  
657 Several highly female-biased sulfotransferase genes, including *Sult2a2*, *Sult2a5* and *Sult2a6*, failed to  
658 be substantially feminized in Ezh1/Ezh2-deficient male liver. Hepatic expression of these genes was  
659 also only partially feminized in male mice when the male, pulsatile pattern of GH stimulation is  
660 abolished by hypophysectomy, or when circulating GH profiles are feminized in continuous GH-infused  
661 male mice. (Fig. 3). The partial feminization achieved in the latter two mouse models, where GH  
662 signaling is disrupted, could be due to early, irreversible postnatal effects of GH, which may imprint  
663 (program) liver gene expression patterns [67]. In the case of *Sult2a5* and *Sult2a6*, the high levels of  
664 H3K27me3 across the gene body in wild-type male mouse liver were largely abolished in E1/E2-KO  
665 male liver (Fig. S2B). Nevertheless, expression of these *Sult2a* genes only reached 7 to 16% of their  
666 normal, wild-type female level of expression. Further study is needed to elucidate the mechanisms that  
667 establish early, irreversible epigenetic differences in male liver, which may include GH-regulated DNA  
668 methylation of gene regulatory regions [68].

669  
670 E1/E2-KO male mice develop liver fibrosis at 8 months of age, and at 3 months of age, when

671 histopathological abnormalities are not yet apparent, they show much greater susceptibility to the  
672 hepatotoxic effects of CCl<sub>4</sub> as compared to control mice [33]. Here, we found that genes associated  
673 with liver fibrosis and HCC are significantly up-regulated in livers of male E1/E2-KO mice in an age-  
674 dependent manner and following exposure to the hepatotoxin CCl<sub>4</sub> (Fig. 7), which correlates with the  
675 severity of the liver phenotype [33]. E1/E2-KO female liver showed up regulation of the fewest number  
676 of fibrosis/HCC-related genes, consistent with the slower disease progression seen in female liver  
677 [69]. Moreover, H3K27me3 marks decreased and/or activating histone marks increased at 50% of the  
678 fibrosis- and HCC-related genes up-regulated in 7-week-old E1/E2-KO male liver, similar to the full set  
679 of E1/E2-KO up-regulated genes (Table S6M).

680

681 Female-biased genes dominate the set of fibrosis/HCC-related genes that were up-regulated in  
682 E1/E2-KO male liver. This raises the question of why increased expression of these female-biased  
683 genes leads to an increase in liver fibrosis, in particular in male *Ezh1/Ezh2*-deficient mice [33];  
684 whereas, in wild-type liver, the higher expression of these genes compared to male liver is associated  
685 with decreased susceptibility to liver fibrosis and liver disease. The answer may relate to our  
686 observation that the set of female-biased genes up-regulated in *Ezh1/Ezh2*-deficient male liver  
687 includes genes that confer protection from HCC in wild-type female liver. One example is *Hao2*, which  
688 is down-regulated in HCC, and its expression inversely correlates with metastasis and survival [70].  
689 *Hao2* is strongly induced in E1/E2-KO male liver, but to only ~60% the level of control (wild-type)  
690 female liver, and this increase in expression may not be not sufficient to counteract the severe liver  
691 injury generated by loss of *Ezh1/Ezh2*. Furthermore, other female-biased genes that have been  
692 recognized as tumor suppressors in HCC, such as *Trim24* [71, 72], are not up-regulated in male  
693 E1/E2-KO liver. Further studies are needed to determine the extent to which the higher expression of  
694 such liver disease-protective genes in female liver contributes to sex-differences in liver fibrosis and  
695 liver disease. Studies such as these take on added significance, given efforts to use *Ezh2* inhibitors  
696 for treatment of HCC [73].

697

698 We identified sex-independent HCC-related genes that were more strongly up-regulated in female  
699 than in male E1/E2-KO liver, and thereby acquire female specificity in E1/E2-KO liver. These genes  
700 include *Igf2*, *H19* and *miR675* (Fig. 7E, Table S10). *Igf2* and *H19* are adjacent, imprinted genes [74]  
701 that show aberrant imprinting and epigenetic abnormalities in HCC [29]. *H19* is highly expressed in  
702 proliferative tissues, including liver regeneration after injury [74], and its first exon encodes miR-675,  
703 whose overexpression promotes liver cancer [62]. The strong up regulation of these three genes in  
704 female E1/E2-KO livers suggests E1/E2-KO female mice may show increased susceptibility to HCC  
705 compared to wild-type female liver in response to CCl<sub>4</sub> and other hepatotoxins.

706  
707 In addition to extensive up regulation of gene expression following loss of H3K27me3 repressive  
708 marks, we identified a significant number of genes that were down-regulated in the absence of Ezh1  
709 and Ezh2, in both male and female liver. In some cases, down regulation was associated with an  
710 unanticipated increase in gene proximal H3K27me3 marks (Fig. 5D). While H3K27me3 is generally  
711 regarded as a repressive mark, H3K27me3 is enriched at the TSS of bivalent genes, and its  
712 enrichment at promoters is associated with active transcription [75]. The partial loss of H3K27me3  
713 marks at E1/E2-KO-responsive genes seen here could represent signal originating from non-  
714 parenchymal cells in the liver, where Ezh1/Ezh2 expression is unchanged [33]. Further, as the loss of  
715 Ezh1/Ezh2 increases cell proliferation [76], residual H3K27me3 marks could perhaps be explained by  
716 the presence of immature hepatocytes, where the Alb-Cre transgene is not yet active [41].

717  
718 The greater incidence of HCC in males has been attributed to the antagonistic effects of the androgen  
719 receptor (AR) and estrogen receptor- $\alpha$  (ER $\alpha$ ) activation on hepatocyte proliferation and liver gene  
720 expression. Moreover, estrogen has been shown to have a protective role in HCC by reducing the  
721 production of inflammatory mediators and by its effects on the hypothalamic-pituitary-gonadal axis  
722 including the modulation of GH secretion [1]. AR and ER $\alpha$  mediated transcriptional regulation is  
723 dependent on FOXA1 and FOXA2 pioneer factors [77]. This study provides more evidence on the  
724 importance of chromatin dynamics in the sex-biased regulation of liver pathophysiology.

725 **Conclusions**

726 Ezh1/Ezh2-dependent, H3K27me3-based repression is essential to establish and maintain GH-  
727 regulated sex differences in liver gene expression. Loss of Ezh1 and Ezh2 in hepatocytes  
728 preferentially de-represses the expression of many female-biased genes in male mouse liver in  
729 association with the loss of H3K27me3 marks and the acquisition of activating histone marks. Finally,  
730 males and females show significant differences in the regulation of liver fibrosis and HCC-related  
731 genes by Ezh1/Ezh2, which may contribute to the sex bias in liver disease progression.

732

733 **List of Abbreviations**

734 ChIP, chromatin immunoprecipitation

735

736 E1/E2-KO mice, or DKO (double-knockout), *Ezh1*-knockout mice with a hepatocyte-specific knockout  
737 of *Ezh2*

738

739 ES, enrichment score

740

741 FC, fold-change

742

743 FDR, false discovery rate

744

745 FPKM, fragments per kilobase per million mapped sequence reads

746

747 GH, growth hormone

748

749 H3K27me3, histone-H3 trimethyl-lysine 27

750

751 HCC, hepatocellular carcinoma

752

753 PRC2, polycomb repressive complex-2

754

755 RiPPM, Reads in Peaks Per Million mapped sequence reads

756

757

758

759

760

761

762

763 **Declarations**

- 764 • **Ethics approval and consent to participate:** Not applicable
- 765 • **Consent for publication:** Not applicable
- 766 • **Availability of data and material:** The datasets generated and/or analyzed during the current
- 767 study are included in this published article and its supplementary information files. Raw and
- 768 processed sequencing files generated in this study are available at GEO under accession
- 769 number GSE110934.
- 770 • **Competing interests:** The authors declare that they have no competing interests.
- 771 • **Funding:** Supported in part by grant DK33765 from the NIH (to DJW) and by the NIH
- 772 Intramural Research Program (to LH). The funding sponsor played no role in the design of the
- 773 study and collection, analysis, and interpretation of data or in writing the manuscript.
- 774 • **Authors' contributions:** DL-C and DJW conceived and designed the study. WKB and LH
- 775 generated the E1/E2-KO mice and provided liver tissues for analysis. DL-C carried out all of
- 776 the laboratory experiments and data analyses. DL-C and DJW jointly wrote and edited the
- 777 manuscript for publication.
- 778 • **Acknowledgements:** We thank Andy Rampersaud of the Waxman Lab for developing the
- 779 sequencing analysis pipeline used in this study.

780

781

782 **References**

- 783 1. Clocchiatti A, Cora E, Zhang Y, Dotto GP: **Sexual dimorphism in cancer.** *Nat Rev Cancer*  
784 2016, **16**(5):330-339.
- 785 2. El-Serag HB: **Epidemiology of viral hepatitis and hepatocellular carcinoma.**  
786 *Gastroenterology* 2012, **142**(6):1264-1273 e1261.
- 787 3. Hanna D, Riedmaier AE, Sugamori KS, Grant DM: **Influence of sex and developmental**  
788 **stage on acute hepatotoxic and inflammatory responses to liver procarcinogens in**  
789 **the mouse.** *Toxicology* 2016, **373**:30-40.
- 790 4. Pramfalk C, Pavlides M, Banerjee R, McNeil CA, Neubauer S, Karpe F, Hodson L: **Sex-**  
791 **Specific Differences in Hepatic Fat Oxidation and Synthesis May Explain the Higher**  
792 **Propensity for NAFLD in Men.** *J Clin Endocrinol Metab* 2015, **100**(12):4425-4433.
- 793 5. Ballestri S, Nascimbeni F, Baldelli E, Marrazzo A, Romagnoli D, Lonardo A: **NAFLD as a**  
794 **Sexual Dimorphic Disease: Role of Gender and Reproductive Status in the**  
795 **Development and Progression of Nonalcoholic Fatty Liver Disease and Inherent**  
796 **Cardiovascular Risk.** *Adv Ther* 2017, **34**(6):1291-1326.
- 797 6. Marin V, Rosso N, Dal Ben M, Raseni A, Boschelle M, Degrassi C, Nemeckova I, Nachtigal P,  
798 Avellini C, Tiribelli C *et al*: **An Animal Model for the Juvenile Non-Alcoholic Fatty Liver**  
799 **Disease and Non-Alcoholic Steatohepatitis.** *PLoS One* 2016, **11**(7):e0158817.
- 800 7. Marcos R, Correia-Gomes C, Miranda H, Carneiro F: **Liver gender dimorphism--insights**  
801 **from quantitative morphology.** *Histol Histopathol* 2015, **30**(12):1431-1437.
- 802 8. Buzzetti E, Parikh PM, Gerussi A, Tsochatzis E: **Gender differences in liver disease and**  
803 **the drug-dose gender gap.** *Pharmacol Res* 2017, **120**:97-108.
- 804 9. Waxman DJ, Holloway MG: **Sex differences in the expression of hepatic drug**  
805 **metabolizing enzymes.** *Mol Pharmacol* 2009, **76**(2):215-228.
- 806 10. Clodfelter KH, Holloway MG, Hodor P, Park SH, Ray WJ, Waxman DJ: **Sex-dependent liver**  
807 **gene expression is extensive and largely dependent upon signal transducer and**  
808 **activator of transcription 5b (STAT5b): STAT5b-dependent activation of male genes**  
809 **and repression of female genes revealed by microarray analysis.** *Molecular*  
810 *endocrinology* 2006, **20**(6):1333-1351.
- 811 11. Holloway MG, Cui Y, Laz EV, Hosui A, Hennighausen L, Waxman DJ: **Loss of sexually**  
812 **dimorphic liver gene expression upon hepatocyte-specific deletion of Stat5a-Stat5b**  
813 **locus.** *Endocrinology* 2007, **148**(5):1977-1986.
- 814 12. Conforto TL, Zhang Y, Sherman J, Waxman DJ: **Impact of CUX2 on the female mouse**  
815 **liver transcriptome: activation of female-biased genes and repression of male-**  
816 **biased genes.** *Molecular and cellular biology* 2012, **32**(22):4611-4627.
- 817 13. Conforto TL, Steinhardt GFt, Waxman DJ: **Cross Talk Between GH-Regulated**  
818 **Transcription Factors HNF6 and CUX2 in Adult Mouse Liver.** *Mol Endocrinol* 2015,  
819 **29**(9):1286-1302.
- 820 14. Melia T, Waxman DJ: **Sex-biased lncRNAs inversely correlate with sex-opposite gene**  
821 **co-expression networks in Diversity Outbred mouse liver.** *Endocrinology* 2019.
- 822 15. Melia T, Hao P, Yilmaz F, Waxman DJ: **Hepatic Long Intergenic Noncoding RNAs: High**  
823 **Promoter Conservation and Dynamic, Sex-Dependent Transcriptional Regulation**  
824 **by Growth Hormone.** *Mol Cell Biol* 2016, **36**(1):50-69.
- 825 16. Hao P, Waxman DJ: **Functional Roles of Sex-Biased, Growth Hormone-Regulated**  
826 **MicroRNAs miR-1948 and miR-802 in Young Adult Mouse Liver.** *Endocrinology* 2018,  
827 **159**(3):1377-1392.

- 828 17. Sugathan A, Waxman DJ: **Genome-wide analysis of chromatin states reveals distinct**  
829 **mechanisms of sex-dependent gene regulation in male and female mouse liver.**  
830 *Molecular and cellular biology* 2013, **33**(18):3594-3610.
- 831 18. Zhang Y, Laz EV, Waxman DJ: **Dynamic, sex-differential STAT5 and BCL6 binding to**  
832 **sex-biased, growth hormone-regulated genes in adult mouse liver.** *Mol Cell Biol* 2012,  
833 **32**(4):880-896.
- 834 19. Lau-Corona D, Suvorov A, Waxman DJ: **Feminization of male mouse liver by persistent**  
835 **growth hormone stimulation: Activation of sex-biased transcriptional networks**  
836 **and dynamic changes in chromatin states.** *Mol Cell Biol* 2017.
- 837 20. Holoch D, Margueron R: **Mechanisms Regulating PRC2 Recruitment and Enzymatic**  
838 **Activity.** *Trends in biochemical sciences* 2017, **42**(7):531-542.
- 839 21. Comet I, Riising EM, Leblanc B, Helin K: **Maintaining cell identity: PRC2-mediated**  
840 **regulation of transcription and cancer.** *Nat Rev Cancer* 2016, **16**(12):803-810.
- 841 22. Reddington JP, Perricone SM, Nestor CE, Reichmann J, Youngson NA, Suzuki M, Reinhardt  
842 D, Dunican DS, Prendergast JG, Mjoseng H *et al*: **Redistribution of H3K27me3 upon DNA**  
843 **hypomethylation results in de-repression of Polycomb target genes.** *Genome Biol*  
844 2013, **14**(3):R25.
- 845 23. Margueron R, Li G, Sarma K, Blais A, Zavadij J, Woodcock CL, Dynlacht BD, Reinberg D:  
846 **Ezh1 and Ezh2 maintain repressive chromatin through different mechanisms.** *Mol*  
847 *Cell* 2008, **32**(4):503-518.
- 848 24. Aranda S, Mas G, Di Croce L: **Regulation of gene transcription by Polycomb proteins.**  
849 *Sci Adv* 2015, **1**(11):e1500737.
- 850 25. Koike H, Ouchi R, Ueno Y, Nakata S, Obana Y, Sekine K, Zheng YW, Takebe T, Isono K,  
851 Koseki H *et al*: **Polycomb group protein Ezh2 regulates hepatic progenitor cell**  
852 **proliferation and differentiation in murine embryonic liver.** *PLoS One* 2014,  
853 **9**(8):e104776.
- 854 26. Lee YY, Mok MT, Kang W, Yang W, Tang W, Wu F, Xu L, Yan M, Yu Z, Lee SD *et al*: **Loss of**  
855 **tumor suppressor IGFBP4 drives epigenetic reprogramming in hepatic**  
856 **carcinogenesis.** *Nucleic Acids Res* 2018.
- 857 27. Gao SB, Zheng QF, Xu B, Pan CB, Li KL, Zhao Y, Zheng QL, Lin X, Xue LX, Jin GH: **EZH2**  
858 **represses target genes through H3K27-dependent and H3K27-independent**  
859 **mechanisms in hepatocellular carcinoma.** *Mol Cancer Res* 2014, **12**(10):1388-1397.
- 860 28. Au SL, Ng IO, Wong CM: **Epigenetic dysregulation in hepatocellular carcinoma: focus**  
861 **on polycomb group proteins.** *Front Med* 2013, **7**(2):231-241.
- 862 29. He Y, Meng XM, Huang C, Wu BM, Zhang L, Lv XW, Li J: **Long noncoding RNAs: Novel**  
863 **insights into hepatocellular carcinoma.** *Cancer Lett* 2014, **344**(1):20-27.
- 864 30. Yang F, Zhang L, Huo XS, Yuan JH, Xu D, Yuan SX, Zhu N, Zhou WP, Yang GS, Wang YZ *et al*:  
865 **Long noncoding RNA high expression in hepatocellular carcinoma facilitates tumor**  
866 **growth through enhancer of zeste homolog 2 in humans.** *Hepatology* 2011,  
867 **54**(5):1679-1689.
- 868 31. Kim KH, Roberts CW: **Targeting EZH2 in cancer.** *Nat Med* 2016, **22**(2):128-134.
- 869 32. Nakagawa M, Kitabayashi I: **Oncogenic roles of enhancer of zeste homolog 1/2 in**  
870 **hematological malignancies.** *Cancer Sci* 2018.
- 871 33. Bae WK, Kang K, Yu JH, Yoo KH, Factor VM, Kaji K, Matter M, Thorgeirsson S,  
872 Hennighausen L: **The methyltransferases enhancer of zeste homolog (EZH) 1 and**  
873 **EZH2 control hepatocyte homeostasis and regeneration.** *FASEB journal : official*  
874 *publication of the Federation of American Societies for Experimental Biology* 2015,  
875 **29**(5):1653-1662.

- 876 34. Sakurai T, Kudo M: **Molecular Link between Liver Fibrosis and Hepatocellular**  
877 **Carcinoma.** *Liver Cancer* 2013, **2**(3-4):365-366.
- 878 35. Cui Y, Hosui A, Sun R, Shen K, Gavrilova O, Chen W, Cam MC, Gao B, Robinson GW,  
879 Hennighausen L: **Loss of signal transducer and activator of transcription 5 leads to**  
880 **hepatosteatosis and impaired liver regeneration.** *Hepatology* 2007, **46**(2):504-513.
- 881 36. Mueller KM, Kornfeld JW, Friedbichler K, Blaas L, Egger G, Esterbauer H, Hasselblatt P,  
882 Schleder M, Haindl S, Wagner KU *et al*: **Impairment of hepatic growth hormone and**  
883 **glucocorticoid receptor signaling causes steatosis and hepatocellular carcinoma in**  
884 **mice.** *Hepatology* 2011, **54**(4):1398-1409.
- 885 37. Baik M, Nam YS, Piao MY, Kang HJ, Park SJ, Lee JH: **Liver-specific deletion of the signal**  
886 **transducer and activator of transcription 5 gene aggravates fatty liver in response**  
887 **to a high-fat diet in mice.** *J Nutr Biochem* 2016, **29**:56-63.
- 888 38. Chhabra Y, Nelson CN, Plescher M, Barclay JL, Smith AG, Andrikopoulos S, Mangiafico S,  
889 Waxman DJ, Brooks AJ, Waters MJ: **Loss of growth hormone-mediated signal**  
890 **transducer and activator of transcription 5 (STAT5) signaling in mice results in**  
891 **insulin sensitivity with obesity.** *FASEB journal : official publication of the Federation of*  
892 *American Societies for Experimental Biology* 2019:fj201802328R.
- 893 39. Cordoba-Chacon J, Majumdar N, List EO, Diaz-Ruiz A, Frank SJ, Manzano A, Bartrons R,  
894 Puchowicz M, Kopchick JJ, Kineman RD: **Growth Hormone Inhibits Hepatic De Novo**  
895 **Lipogenesis in Adult Mice.** *Diabetes* 2015, **64**(9):3093-3103.
- 896 40. Su IH, Basavaraj A, Krutchinsky AN, Hobert O, Ullrich A, Chait BT, Tarakhovskiy A: **Ezh2**  
897 **controls B cell development through histone H3 methylation and Igh**  
898 **rearrangement.** *Nat Immunol* 2003, **4**(2):124-131.
- 899 41. Weisend CM, Kundert JA, Suvorova ES, Prigge JR, Schmidt EE: **Cre activity in fetal albCre**  
900 **mouse hepatocytes: Utility for developmental studies.** *Genesis* 2009, **47**(12):789-792.
- 901 42. Ezhkova E, Lien WH, Stokes N, Pasolli HA, Silva JM, Fuchs E: **EZH1 and EZH2 cogovern**  
902 **histone H3K27 trimethylation and are essential for hair follicle homeostasis and**  
903 **wound repair.** *Genes Dev* 2011, **25**(5):485-498.
- 904 43. Conforto TL, Waxman DJ: **Sex-specific mouse liver gene expression: genome-wide**  
905 **analysis of developmental changes from pre-pubertal period to young adulthood.**  
906 *Biol Sex Differ* 2012, **3**:9.
- 907 44. Connerney J, Lau-Corona D, Rampersaud A, Waxman DJ: **Activation of Male Liver**  
908 **Chromatin Accessibility and STAT5-dependent Gene Transcription by Plasma**  
909 **Growth Hormone Pulses.** *Endocrinology* 2017, **158**(4):1-20.
- 910 45. Trapnell C, Roberts A, Goff L, Pertea G, Kim D, Kelley DR, Pimentel H, Salzberg SL, Rinn JL,  
911 Pachter L: **Differential gene and transcript expression analysis of RNA-seq**  
912 **experiments with TopHat and Cufflinks.** *Nature protocols* 2012, **7**(3):562-578.
- 913 46. Liao Y, Smyth GK, Shi W: **featureCounts: an efficient general purpose program for**  
914 **assigning sequence reads to genomic features.** *Bioinformatics* 2014, **30**(7):923-930.
- 915 47. Robinson MD, McCarthy DJ, Smyth GK: **edgeR: a Bioconductor package for differential**  
916 **expression analysis of digital gene expression data.** *Bioinformatics* 2010, **26**(1):139-  
917 140.
- 918 48. Lodato NJ, Rampersaud A, Waxman DJ: **Impact of CAR Agonist Ligand TCPOBOP on**  
919 **Mouse Liver Chromatin Accessibility.** *Toxicol Sci* 2018, **164**(1):115-128.
- 920 49. Langmead B, Salzberg SL: **Fast gapped-read alignment with Bowtie 2.** *Nat Methods*  
921 2012, **9**(4):357-359.



- 922 50. Xu S, Grullon S, Ge K, Peng W: **Spatial clustering for identification of ChIP-enriched**  
923 **regions (SICER) to map regions of histone methylation patterns in embryonic stem**  
924 **cells.** *Methods Mol Biol* 2014, **1150**:97-111.
- 925 51. Zhang Y, Liu T, Meyer CA, Eeckhoute J, Johnson DS, Bernstein BE, Nusbaum C, Myers RM,  
926 Brown M, Li W *et al*: **Model-based analysis of ChIP-Seq (MACS).** *Genome Biol* 2008,  
927 **9(9)**:R137.
- 928 52. Shen L, Shao NY, Liu X, Maze I, Feng J, Nestler EJ: **diffReps: detecting differential**  
929 **chromatin modification sites from ChIP-seq data with biological replicates.** *PLoS One*  
930 2013, **8(6)**:e65598.
- 931 53. Orlando DA, Chen MW, Brown VE, Solanki S, Choi YJ, Olson ER, Fritz CC, Bradner JE,  
932 Guenther MG: **Quantitative ChIP-Seq normalization reveals global modulation of the**  
933 **epigenome.** *Cell Rep* 2014, **9(3)**:1163-1170.
- 934 54. McLean CY, Bristol D, Hiller M, Clarke SL, Schaar BT, Lowe CB, Wenger AM, Bejerano G:  
935 **GREAT improves functional interpretation of cis-regulatory regions.** *Nat Biotechnol*  
936 2010, **28(5)**:495-501.
- 937 55. Behrens A, Sibilia M, David JP, Mohle-Steinlein U, Tronche F, Schutz G, Wagner EF:  
938 **Impaired postnatal hepatocyte proliferation and liver regeneration in mice lacking**  
939 **c-jun in the liver.** *EMBO J* 2002, **21(7)**:1782-1790.
- 940 56. Laz EV, Holloway MG, Chen CS, Waxman DJ: **Characterization of three growth**  
941 **hormone-responsive transcription factors preferentially expressed in adult female**  
942 **liver.** *Endocrinology* 2007, **148(7)**:3327-3337.
- 943 57. Wauthier V, Sugathan A, Meyer RD, Dombkowski AA, Waxman DJ: **Intrinsic sex**  
944 **differences in the early growth hormone responsiveness of sex-specific genes in**  
945 **mouse liver.** *Mol Endocrinol* 2010, **24(3)**:667-678.
- 946 58. Holloway MG, Laz EV, Waxman DJ: **Codependence of growth hormone-responsive,**  
947 **sexually dimorphic hepatic gene expression on signal transducer and activator of**  
948 **transcription 5b and hepatic nuclear factor 4alpha.** *Mol Endocrinol* 2006, **20(3)**:647-  
949 660.
- 950 59. Rada-Iglesias A, Bajpai R, Swigut T, Brugmann SA, Flynn RA, Wysocka J: **A unique**  
951 **chromatin signature uncovers early developmental enhancers in humans.** *Nature*  
952 2011, **470(7333)**:279-283.
- 953 60. Margueron R, Reinberg D: **The Polycomb complex PRC2 and its mark in life.** *Nature*  
954 2011, **469(7330)**:343-349.
- 955 61. Buettner N, Thimme R: **Sexual dimorphism in hepatitis B and C and hepatocellular**  
956 **carcinoma.** *Seminars in immunopathology* 2018.
- 957 62. Li H, Li J, Jia S, Wu M, An J, Zheng Q, Zhang W, Lu D: **miR675 upregulates long**  
958 **noncoding RNA H19 through activating EGR1 in human liver cancer.** *Oncotarget*  
959 2015, **6(31)**:31958-31984.
- 960 63. Ling G, Sugathan A, Mazor T, Fraenkel E, Waxman DJ: **Unbiased, genome-wide in vivo**  
961 **mapping of transcriptional regulatory elements reveals sex differences in**  
962 **chromatin structure associated with sex-specific liver gene expression.** *Molecular*  
963 *and cellular biology* 2010, **30(23)**:5531-5544.
- 964 64. Humphries C: **Sex differences: Luck of the chromosomes.** *Nature* 2014, **516(7529)**:S10-  
965 11.
- 966 65. Meyer RD, Laz EV, Su T, Waxman DJ: **Male-specific hepatic Bcl6: growth hormone-**  
967 **induced block of transcription elongation in females and binding to target genes**  
968 **inversely coordinated with STAT5.** *Mol Endocrinol* 2009, **23(11)**:1914-1926.

- 969 66. Pasini D, Malatesta M, Jung HR, Walfridsson J, Willer A, Olsson L, Skotte J, Wutz A, Porse B,  
970 Jensen ON *et al*: **Characterization of an antagonistic switch between histone H3**  
971 **lysine 27 methylation and acetylation in the transcriptional regulation of Polycomb**  
972 **group target genes.** *Nucleic Acids Res* 2010, **38**(15):4958-4969.
- 973 67. Das RK, Banerjee S, Shapiro BH: **Growth hormone: a newly identified developmental**  
974 **organizer.** *J Endocrinol* 2017, **232**(3):377-389.
- 975 68. Reizel Y, Spiro A, Sabag O, Skversky Y, Hecht M, Keshet I, Berman BP, Cedar H: **Gender-**  
976 **specific postnatal demethylation and establishment of epigenetic memory.** *Genes*  
977 *Dev* 2015, **29**(9):923-933.
- 978 69. Yokoyama Y, Nimura Y, Nagino M, Bland KI, Chaudry IH: **Current understanding of**  
979 **gender dimorphism in hepatic pathophysiology.** *J Surg Res* 2005, **128**(1):147-156.
- 980 70. Mattu S, Fornari F, Quagliata L, Perra A, Angioni MM, Petrelli A, Menegon S, Morandi A,  
981 Chiarugi P, Ledda-Columbano GM *et al*: **The metabolic gene HAO2 is downregulated in**  
982 **hepatocellular carcinoma and predicts metastasis and poor survival.** *J Hepatol* 2016,  
983 **64**(4):891-898.
- 984 71. Herquel B, Ouararhni K, Khetchoumian K, Ignat M, Teletin M, Mark M, B<sup>√</sup>©chade G, Van  
985 Dorsselaer A, Sanglier-Cianf<sup>√</sup>©rani S, Hamiche A *et al*: **Transcription cofactors**  
986 **TRIM24, TRIM28, and TRIM33 associate to form regulatory complexes that**  
987 **suppress murine hepatocellular carcinoma.** *Proceedings of the National Academy of*  
988 *Sciences* 2011, **108**(20):8212-8217.
- 989 72. Jiang S, Minter LC, Stratton SA, Yang P, Abbas HA, Akdemir ZC, Pant V, Post S, Gagea M, Lee  
990 RG *et al*: **TRIM24 suppresses development of spontaneous hepatic lipid**  
991 **accumulation and hepatocellular carcinoma in mice.** *J Hepatol* 2015, **62**(2):371-379.
- 992 73. Sanna L, Marchesi I, Melone MAB, Bagella L: **The role of enhancer of zeste homolog 2:**  
993 **From viral epigenetics to the carcinogenesis of hepatocellular carcinoma.** *J Cell*  
994 *Physiol* 2018.
- 995 74. Pope C, Piekos SC, Chen L, Mishra S, Zhong XB: **The role of H19, a long non-coding RNA,**  
996 **in mouse liver postnatal maturation.** *PLoS One* 2017, **12**(11):e0187557.
- 997 75. Young MD, Willson TA, Wakefield MJ, Trounson E, Hilton DJ, Blewitt ME, Oshlack A,  
998 Majewski IJ: **ChIP-seq analysis reveals distinct H3K27me3 profiles that correlate**  
999 **with transcriptional activity.** *Nucleic Acids Res* 2011, **39**(17):7415-7427.
- 1000 76. Bracken AP, Pasini D, Capra M, Prosperini E, Colli E, Helin K: **EZH2 is downstream of the**  
1001 **pRB-E2F pathway, essential for proliferation and amplified in cancer.** *EMBO J* 2003,  
1002 **22**(20):5323-5335.
- 1003 77. Li Z, Tuteja G, Schug J, Kaestner KH: **Foxa1 and Foxa2 are essential for sexual**  
1004 **dimorphism in liver cancer.** *Cell* 2012, **148**(1-2):72-83.

1005

1006

1007 **Table 1.** Number of fibrosis-related or HCC-related genes induced or repressed in E1/E2-KO livers or  
1008 with each of the indicated treatments.

|                                    | Liver Fibrosis (217) |           | HCC (920) |           |
|------------------------------------|----------------------|-----------|-----------|-----------|
|                                    | Induced              | Repressed | Induced   | Repressed |
| E1/E2-KOM/Male (7 weeks)           | 22                   | 1         | 96        | 10        |
| E1/E2-KOF/Female (7 weeks)         | 10                   | 1         | 62        | 17        |
| E1/E2-KOM/Male (8 months)          | 24                   | 2         | 110       | 6         |
| CCl <sub>4</sub> treated Male/Male | 46                   | 11        | 189       | 79        |
| E1/E2-KOM + CCl <sub>4</sub> /Male | 63                   | 10        | 245       | 68        |

1009

1010 **Figures and Figure legends**

1011

1012 **Fig. 1. *Ezh1* and *Ezh2* expression in wild-type pre-pubertal and young adult liver and in E1/E2-**  
1013 **KO mouse liver. (A)** Relative expression levels of *Ezh1* and *Ezh2* determined by RT-qPCR in male  
1014 and female mouse livers at 2, 3, 4 and 8 weeks of age. Data shown are mean  $\pm$  SEM for n=3 (*Ezh1*)  
1015 or n=6 (*Ezh2*) individual livers per group. Primers used are shown in Table S1A and their location is  
1016 marked with a green box in Fig. 1B. Significance values by Student's t-test are indicated in each  
1017 figure, as follows: \*  $p < 0.05$ ; \*\*  $p < 0.01$  and \*\*\*  $p < 0.001$ . **(B)** UCSC genome browser screenshots of  
1018 RNA-seq BigWig tracks evidencing the absence in 7-week male and female E1/E2-KO livers of *Ezh1*  
1019 and *Ezh2* sequence reads from several exons, including those that code for the SET domain (*Ezh1*  
1020 *exons 17-21* and *Ezh2 exons 16-19*, marked with a red box). **(C)** In the case of *Ezh1*, but not *Ezh2*,  
1021 gene disruption leads to a significant decrease in overall normalized sequence reads, shown in units  
1022 of FPKM. Data are mean  $\pm$  SEM values for n=3 individual livers per group. Significance values  
1023 represent FDR values determined by EdgeR, \*\*\*  $p < 0.001$ . DKO, *Ezh1/Ezh2* double knockout male  
1024 (M) and female (F) mouse liver.

1025

1026 **Fig. 2. E1/E2-KO de-represses female-biased genes in male liver. (A)** Percentage of all RefSeq  
1027 genes that are liver-expressed (FPKM >1) and either sex-biased (male/female FDR < 0.01; n=1,131  
1028 genes) (Table S2) or stringently sex-independent (male/female |fold-change| < 1.2 and FDR > 0.1;  
1029 n=8,021 genes) (Table S3) whose expression in E1/E2-KO liver is significantly changed compared to  
1030 control liver (|fold-change| >1.5 at FDR <0.05) ('responsive genes'). The number of sex-biased genes  
1031 that are up or down regulated in E1/E2-KO liver and their enrichment (ES, enrichment score)  
1032 compared to E1/E2-KO-responsive, stringently-sex independent genes is shown above each bar. **(B)**  
1033 Log<sub>2</sub> expression ratios for E1/E2-KO/control liver vs log<sub>2</sub> sex-ratio for 1,131 sex-biased genes,  
1034 determined in male (blue) and female (red) mouse liver. Dashed lines, significance cutoff values for  
1035 each comparison. **(C)** Overlap of E1/E2-KO-responsive female-biased genes (and separately, male-  
1036 biased genes) identified in male liver (blue) vs. female liver (pink). Overlaps are shown separately for  
1037 genes that are up regulated (*left*) and genes that are down regulated (*right*) in E1/E2-KO liver. Shown  
1038 at the bottom are the overlaps of stringent sex-independent genes that were E1/E2-KO responsive in  
1039 male vs. female liver. Significant enrichment scores (ES) compared to a background set of 11,491  
1040 liver-expressed genes (FPKM >1) are shown in parenthesis. Five genes responded to the loss of  
1041 *Ezh1/Ezh2* in the opposite direction in male vs. female liver and were excluded from these Venn  
1042 diagrams: 4 female-biased genes up regulated in male E1/E2-KO and down regulated in female  
1043 E1/E2-KO, and 1 male-biased gene up regulated in female E1/E2-KO and down regulated in male  
1044 E1/E2-KO. DKO, *Ezh1/Ezh2* double knockout mouse liver. **(D)** Number of E1/E2-KO-responsive sex-  
1045 biased genes that lose, maintain, or gain sex specificity in either male or female E1/E2-KO mouse

1046 liver. Two genes showed a reversal from female to male bias in E1/E2-KO liver and are excluded from  
1047 this list. Sex bias is either: M, male; F, female; or not sex-biased (dashed line). **(E)** Male/female  
1048 expression ratios in control liver and in E1/E2-KO liver, for all 146 E1/E2-KO-responsive, male-biased  
1049 genes (*top*) and for 294 E1/E2-KO-responsive, female-biased genes (*bottom*) (see Table S4).  
1050 Significance by t-test is as indicated.

1051

1052 **Fig. 3. Loss of Ezh1 and Ezh2 partially feminizes the expression of GH-responsive genes. (A)**  
1053 Expression of *Fmo3*, a female-biased class-I hypophysectomy (Hypox)-responsive gene (i.e., is down  
1054 regulated in female liver after Hypox), and *Cyp2b9*, a female-biased class-II Hypox-responsive gene  
1055 (i.e., is up regulated in male liver after Hypox), in total RNA isolated from floxed control and E1/E2-KO  
1056 male and female mouse liver. The data shown are mean +/- SD values determined by RT-qPCR for  
1057 individual livers obtained from 9-12 mice per group. The mean expression value for the control female  
1058 group was set to 1. Significance values by ANOVA are shown: \*,  $p < 0.05$ ; \*\*\*,  $p < 0.001$ . Primers used  
1059 for RT-qPCR analysis are shown in Table S1A. **(B)** Proportion of all female-biased genes ( $n = 127$ ;  
1060 female/male expression ratio  $> 2$ -fold) and proportion of the subset comprised of 73 female-biased  
1061 genes that are up regulated in E1/E2-KO male liver and that respond to Hypox and are either class I  
1062 or class II female-biased genes, or that do not respond to Hypox (NR, not responsive). **(C)** Overlap  
1063 between female-biased genes ( $n = 113$ , male/female expression ratio  $> 2$ -fold, EdgeR FDR  $< 0.01$ , and  
1064 FPKM  $> 1$  in the sets of control female vs male mouse livers from the three models shown) that are  
1065 induced: in E1/E2-KO male liver; following Hypox; or after continuous GH infusion for 14 days (cGH).  
1066 Overlaps are also shown for the set of stringently sex-independent genes, only 5% of genes respond  
1067 in one of the three mouse models, and where a much greater fraction of the genes that respond to  
1068 E1/E2-KO do *not* also respond to Hypox or cGH treatment. Expression data for the 113 female-biased  
1069 genes is presented in Table S5. **(D)** Boxplots showing the distribution of feminization values for 31  
1070 female-biased genes induced in male liver in all three mouse models (see panel C, center). Median  
1071 value, horizontal line in each box; mean value, + sign within or above (green) each box. Statistical  
1072 significance by ANOVA: \*,  $p < 0.05$ . **(E)** Graph, in the form of a MA plot, showing  $\log_2$  male/female  
1073 ratio vs. gene expression level, in  $\log_2$  FPKM units, for the above set of 113 female-biased genes.  
1074 Genes are colored, to indicate which mouse models/mouse treatments result in feminized expression  
1075 of the gene in male liver by  $> 50\%$ . Table at the right shows sex differences and percent feminization  
1076 values for three *Sult2a* family genes largely resistant to feminization and for four other highly female-  
1077 biased genes that show substantial feminization in E1/E2-KO male liver. The strong feminization of  
1078 *Sult2a6* and *Hao2* in hypophysectomized (Hypox) male liver indicates they are class-II female-biased  
1079 genes. Table S5 shows the percentage feminization values for all 113 genes. DKO, Ezh1/Ezh2  
1080 double knockout mouse liver.

1081

1082 **Fig. 4. Normalization of H3K27me3 ChIP-seq.** ChIP-qPCR validation (**A**) and reads per million  
1083 (RPM) normalized read counts (**B**) at a K27me3 static site (top row) and at three K27me3 differential  
1084 sites identified by DiffReps (next three rows). The genomic regions interrogated map to an intergenic  
1085 static region (qPCR amplicon: Chr 7, 53,631,603-53,631,654), *Hao2* (qPCR amplicon: Chr3,  
1086 98,677,644-98,677,901), *Fmo3* (Chr15, 72,993,261-72,993,553) and *Cerk* (Chr1, 164,912,550-  
1087 164,912,800), as shown. qPCR data shown correspond to % input values for n= 4 individual ChIP  
1088 DNA samples per group, mean +/- SEM, with significance values determined by ANOVA with Tukey's  
1089 multiple comparisons test (\*\*\*, p< 0.001). B, data are shown for each of the four mouse groups and  
1090 the input control, as described in Methods. Read counts were obtained for the genomic location  
1091 corresponding to the qPCR amplicon plus 100 bp, which aims to approximate the 200 bp average  
1092 sequence library insert size. Primers used for qPCR are shown in Table S1B. DKO, *Ezh1/Ezh2*  
1093 double knockout mouse liver. (**C**) UCSC Browser screenshots showing loss of H3K27me3 sequence  
1094 reds across the gene bodies of four female-biased genes. The female-bias in H3K27me3 read density  
1095 in control liver (first and third read tracks) but not in E1/E2-KO liver (DKO; second and fourth read  
1096 tracks) is also apparent.

1097  
1098 **Fig. 5. H3K27me3 ChIP-seq.** (**A**) Number of sex-biased H3K27me3 sites found in control and in  
1099 E1/E2-KO male and female mouse liver chromatin, as shown above each column. Sex-bias was lost  
1100 at all 549 H3K27me3 sites in E1/E2-KO liver. 29 other H3K27me3 sites acquire male bias and 34  
1101 sites acquire female bias in the E1/E2-KO livers; the latter sets of sites are associated with 24 genes,  
1102 of which only 5 are responsive to *Ezh1/Ezh2* loss and only one is sex-biased (data not shown). Also  
1103 see Table S6A. (**B**) Number of H3K27me3 sites that were up regulated or were down regulated in  
1104 E1/E2-KO male liver, or in E1/E2-KO female liver, when compared to control mice of the same sex,  
1105 based on Table S6B and Table S6C. (**C**) H3K27me3 sites that are up regulated and down regulated  
1106 in E1/E2-KO male and E1/E2-KO female liver compared to sex-matched control livers, based on  
1107 diffReps FDR <0.05, FC >2. Venn diagrams show the overlap between sets of sites for the indicated  
1108 male-female comparisons. (**D**) Shown on the *left* are heat maps for H3K27me3 sites that are  
1109 significantly differential only in E1/E2-KO male vs. control male comparison (E1/E2-KO-M unique  
1110 differential sites) (first column in heat map) and RNA-seq expression ratios for their associated genes  
1111 (next three columns). Similarly: *Right* heat map, H3K27me3 sites that are differential only in E1/E2-  
1112 KO female vs. control female comparison (E1/E2-KO-F unique) and their associated genes; and  
1113 *Middle* heat map, H3K27me3 differential sites common to E1/E2-KO males and E1/E2-KO females  
1114 and their associated genes. Gene associations for each H3K27me3 site were based on the diffReps  
1115 tool's output for those sites located in the gene body or promoter region. Values in the first column of  
1116 each heat map represent log<sub>2</sub> fold-change of the ChIP-seq signal between E1/E2-KO and control  
1117 liver, and the values for each of the remaining 3 columns represent the log<sub>2</sub> fold-change of the gene

1118 expression values between the indicated conditions, determined by RNA-seq. Shown above each  
1119 heat map is the number and percentage of sites that were associated with genes. (E) Shown are the  
1120 enrichment scores and their p-values (see Table S11) for female-biased genes associated with down  
1121 regulated or up regulated H3K27me3 sites. (F) Log<sub>2</sub> of E1/E2-KO/control K27me3 signal fold-change  
1122 at those sites where the density of H3K27me3 marks decreases (Down) or increases (Up) in male  
1123 and female E1/E2-KO liver. DKO, Ezh1/Ezh2 double knockout mouse liver.

1124

1125 **Fig. 6. De-repression of gene expression and responsive histone marks.** (A) Number of sites that  
1126 show a significant decrease (Down) or a significant increase (Up) in each histone mark in E1/E2-KO  
1127 male and E1/E2-KO female liver compared to sex-matched control liver. (B) Number of male-biased  
1128 sites (Male) and number of female-biased sites (Female) for H3K27ac and H3K4me1 in control liver,  
1129 and in E1/E2-KO liver. See listings in Table S6. (C) Patterns of histone mark changes associated with  
1130 E1/E2-KO-responsive genes. *Upper pie chart*: proportion of the 226 stringent-sex independent genes  
1131 that are up regulated in E1/E2-KO male liver that show a decrease in H3K27me3 marks at their gene  
1132 body or promoter region, or are associated with an induced H3K27ac or H3K4me1 mark, as  
1133 determined by GREAT (see Methods). *Lower pie chart*: results shown for the 260 sex-biased genes  
1134 up regulated in E1/E2-KO male liver. Consistent with data shown in Fig. 2 and Table S4, 846 genes  
1135 are up-regulated in male liver, of which 260 are sex-biased (154+86+16+4= 260) and 226 are sex  
1136 independent (143 + 83 =226). (D) *Upper boxplots* show the distribution of log<sub>2</sub> fold-change values of  
1137 E1/E2-KO-male/control male for the 846 genes up-regulated in male E1/E2-KO liver in each of the  
1138 groups, based on their association with responsive histone marks. *Lower boxplots* show the  
1139 distribution of log<sub>2</sub> fold-change values of E1/E2-KO-male/control male only for the 244 female-biased  
1140 genes up regulated in male E1/E2-KO liver, in each of the groups based on their association with  
1141 responsive histone marks. (E) *Upper boxplots* show the distribution of log<sub>2</sub> sex-ratio for the 244  
1142 female-biased genes up regulated in male E1/E2-KO liver, in each of the groups based on their  
1143 association with responsive histone marks. *Lower boxplots* show the distribution of feminization  
1144 percentages for the 244 female-biased genes up-regulated in the male E1/E2-KO livers, in each of the  
1145 groups based on their association with responsive histone marks. Significance values by t-test are  
1146 indicated in each figure as follows: \*, p < 0.05; \*\*, p < 0.01; DKO, Ezh1/Ezh2 double knockout mouse  
1147 liver.

1148

1149 **Fig. 7. Sex-biased dysregulation of liver fibrosis and HCC related genes.** (A) Heat maps showing  
1150 log<sub>2</sub> expression ratios for 104 responsive fibrosis-related genes and for 425 responsive HCC-related  
1151 genes for the 6 indicated comparisons: control male vs. control female, E1/E2-KO female vs. control  
1152 female, E1/E2-KO male vs. control male, 8-month-old E1/E2-KO male vs. 8-month-old control males,  
1153 males treated with CCl<sub>4</sub> and E1/E2-KO males treated with CCl<sub>4</sub> compared to their age-matched  
1154 controls. Color bars for ratios ranging  $\pm 2$  or  $\pm 3$  log<sub>2</sub>, as indicated. Average linkage hierarchical  
1155 clustering implemented on the rows. (B) Boxplots showing the distribution of log<sub>2</sub> expression changes  
1156 for 9 fibrosis-related genes (green) and 52 HCC-related genes (purple) that are up regulated in both  
1157 7-week and 8-month E1/E2-KO male liver. Values shown for 7-week E1/E2-KO males, 8-month  
1158 E1/E2-KO males, males treated with CCl<sub>4</sub> and E1/E2-KO males treated with CCl<sub>4</sub> compared to their  
1159 age-matched controls, as described in Methods. Statistical significance obtained by Student's t-test  
1160 and indicated as follows: \* P < 0.05; \*\* P < 0.01 and \*\*\* P < 0.001. The nine fibrosis-related genes are  
1161 listed in table S7 and the 52 HCC-related genes are listed in Table S8 (C) Enrichment, or depletion, of  
1162 female-biased genes and stringent sex-independent genes for being in the set of dysregulated  
1163 fibrosis-related or HCC related genes as compared to all liver expressed genes. (D) Expression of  
1164 *Igf2*, *H19* and *miR675* determined by RNA-seq (FPKM values) in 7-week male and female control  
1165 livers and in livers of male and female E1/E2-KO mice. Data shown are mean expression levels  
1166 based on n=4 individual livers per group. Significance values are based on FDR values determined by  
1167 EdgeR: \*\* P<0.01, and \*\*\* P < 0.001. (E) UCSC genome browser screenshot of the *Igf2-H19-Mir675*  
1168 gene locus. Shown are normalized sequence read tracks for H3K27ac, H3K4me1 and H3K27me3  
1169 ChIP-seq data. This gene locus has a female-biased DNase hypersensitive site [63] flanked by a  
1170 female-biased H3K4me1 site that is further induced in E1/E2-KO female liver (horizontal red bars at  
1171 the bottom), consistent with the greater gene induction seen in female liver. DKO, *Ezh1/Ezh2* double  
1172 knockout mouse liver.

1173

1174

### 1175 **Supplemental Figure legends**

1176

1177 **Fig. S1. Heat map for the set of 440 E1/E2-KO-responsive sex-biased genes**, based on log<sub>2</sub> fold-  
1178 change values for each of the four indicated comparisons. DKO, *Ezh1/Ezh2* double knockout mouse  
1179 liver.

1180

1181 **Fig. S2. E1/E2-KO-responsive female-biased genes.** A, top. Listing of expression data for genes  
1182 whose UCSC Browser screenshots are shown in this figure. Data shown are fold-change and  
1183 adjusted p-value for each of the following comparisons: Male control vs. Female control, Male E1/E2-  
1184 KO vs. Male control, Female E1/E2-KO vs. Female control, and Male E1/E2-KO vs Female E1/E2-



1185 KO. For those genes that are de-repressed in E1/E2-KO male livers, a feminization percentage and  
1186 the differential histone mark group is indicated. **A-D**, Shown are UCSC screenshots of normalized  
1187 RNA-seq or ChIPseq reads for the following E1/E2-KO-responsive female-biased genes: *A1bg*, *Hao2*,  
1188 *Sult2a1*, *Sult2a5*, *Sult2a6*, *Cyp7a1*, *Cyp2c69*, *Cyp2b9*, *Cyp3a16* and *Fmo3*. DKO, Ezh1/Ezh2 double  
1189 knockout mouse liver.

1190

1191 **Fig. S3. Normalization of H3-K27me3 ChIP-seq.** Reads per million (RPM) normalized sequence  
1192 read counts and ChIP-qPCR validation of static H3K27me3 sites for each of the groups and for the  
1193 input control. Read counts were obtained for the genomic location corresponding to the qPCR  
1194 amplicon plus 100 bp to approximate the 200 bp average sequence library insert size. The qPCR data  
1195 corresponds to % input for n= 4 individuals per group, MEAN +/- SEM. The genomic regions  
1196 interrogated map to two intergenic static regions (qPCR amplicons: Chr 7: 53,631,859-53,631,958)  
1197 and Chr 15: 66,117,216-66,117,274). Primers used for qPCR are shown in Table S1B. DKO,  
1198 Ezh1/Ezh2 double knockout mouse liver.

1199

1200 **Fig. S4. Sex-biased H3K27ac and H3K4me1 sites presented in Fig. 6B.** Venn diagrams show the  
1201 low degree of overlap between the sex-biased sites identified in control livers and those identified in  
1202 E1/E2-KO livers. This low overlap between the sets of sex-biased H3K27ac and H3K4me1 sites in  
1203 control, compared to E1/E2-KO mouse liver, indicates that sex-biased chromatin marks are both  
1204 gained and lost in Ezh1/Ezh2-deficient liver. DKO, Ezh1/Ezh2 double knockout mouse liver.

1205

1206

1207

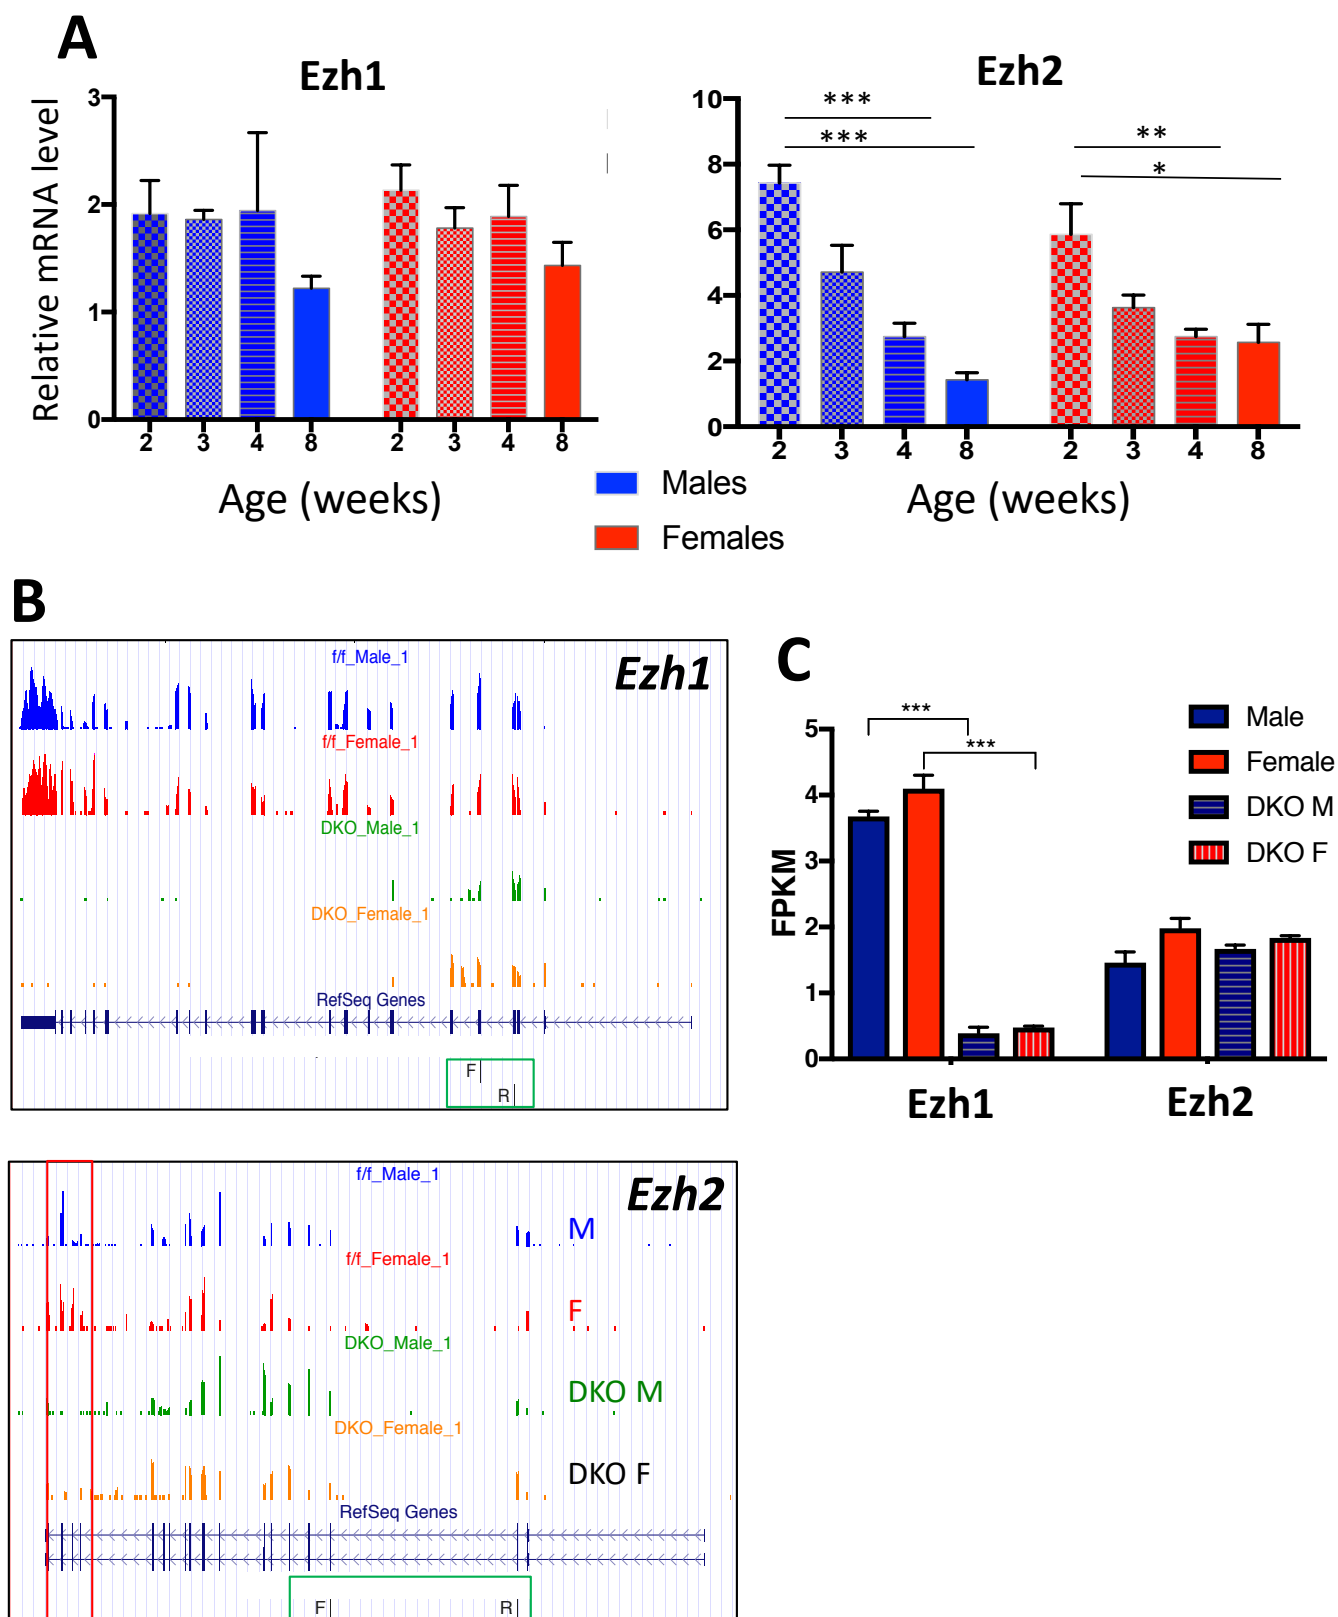

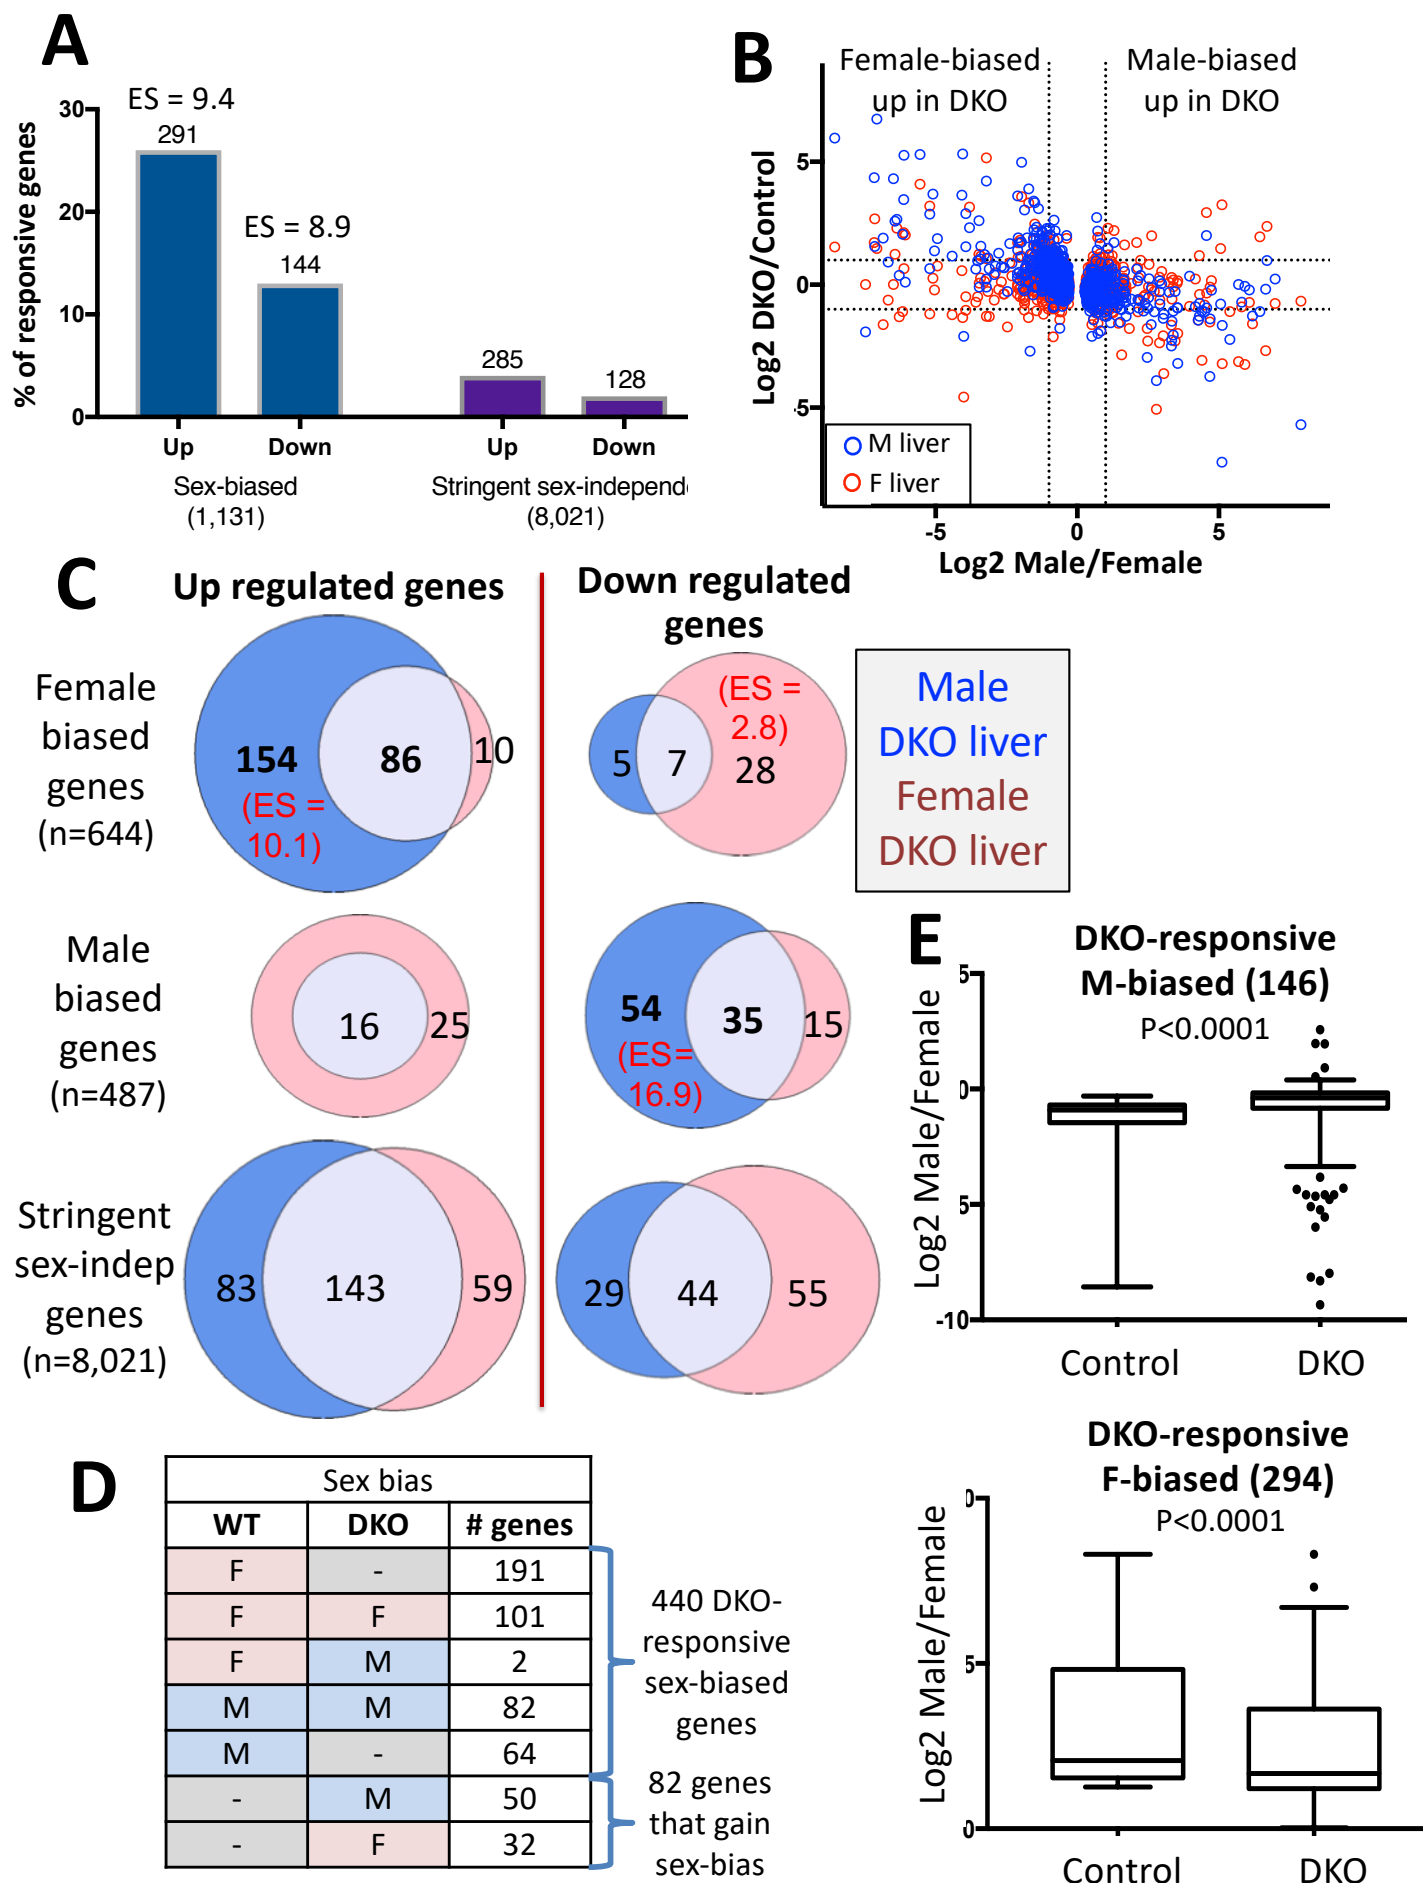

Fig. 3

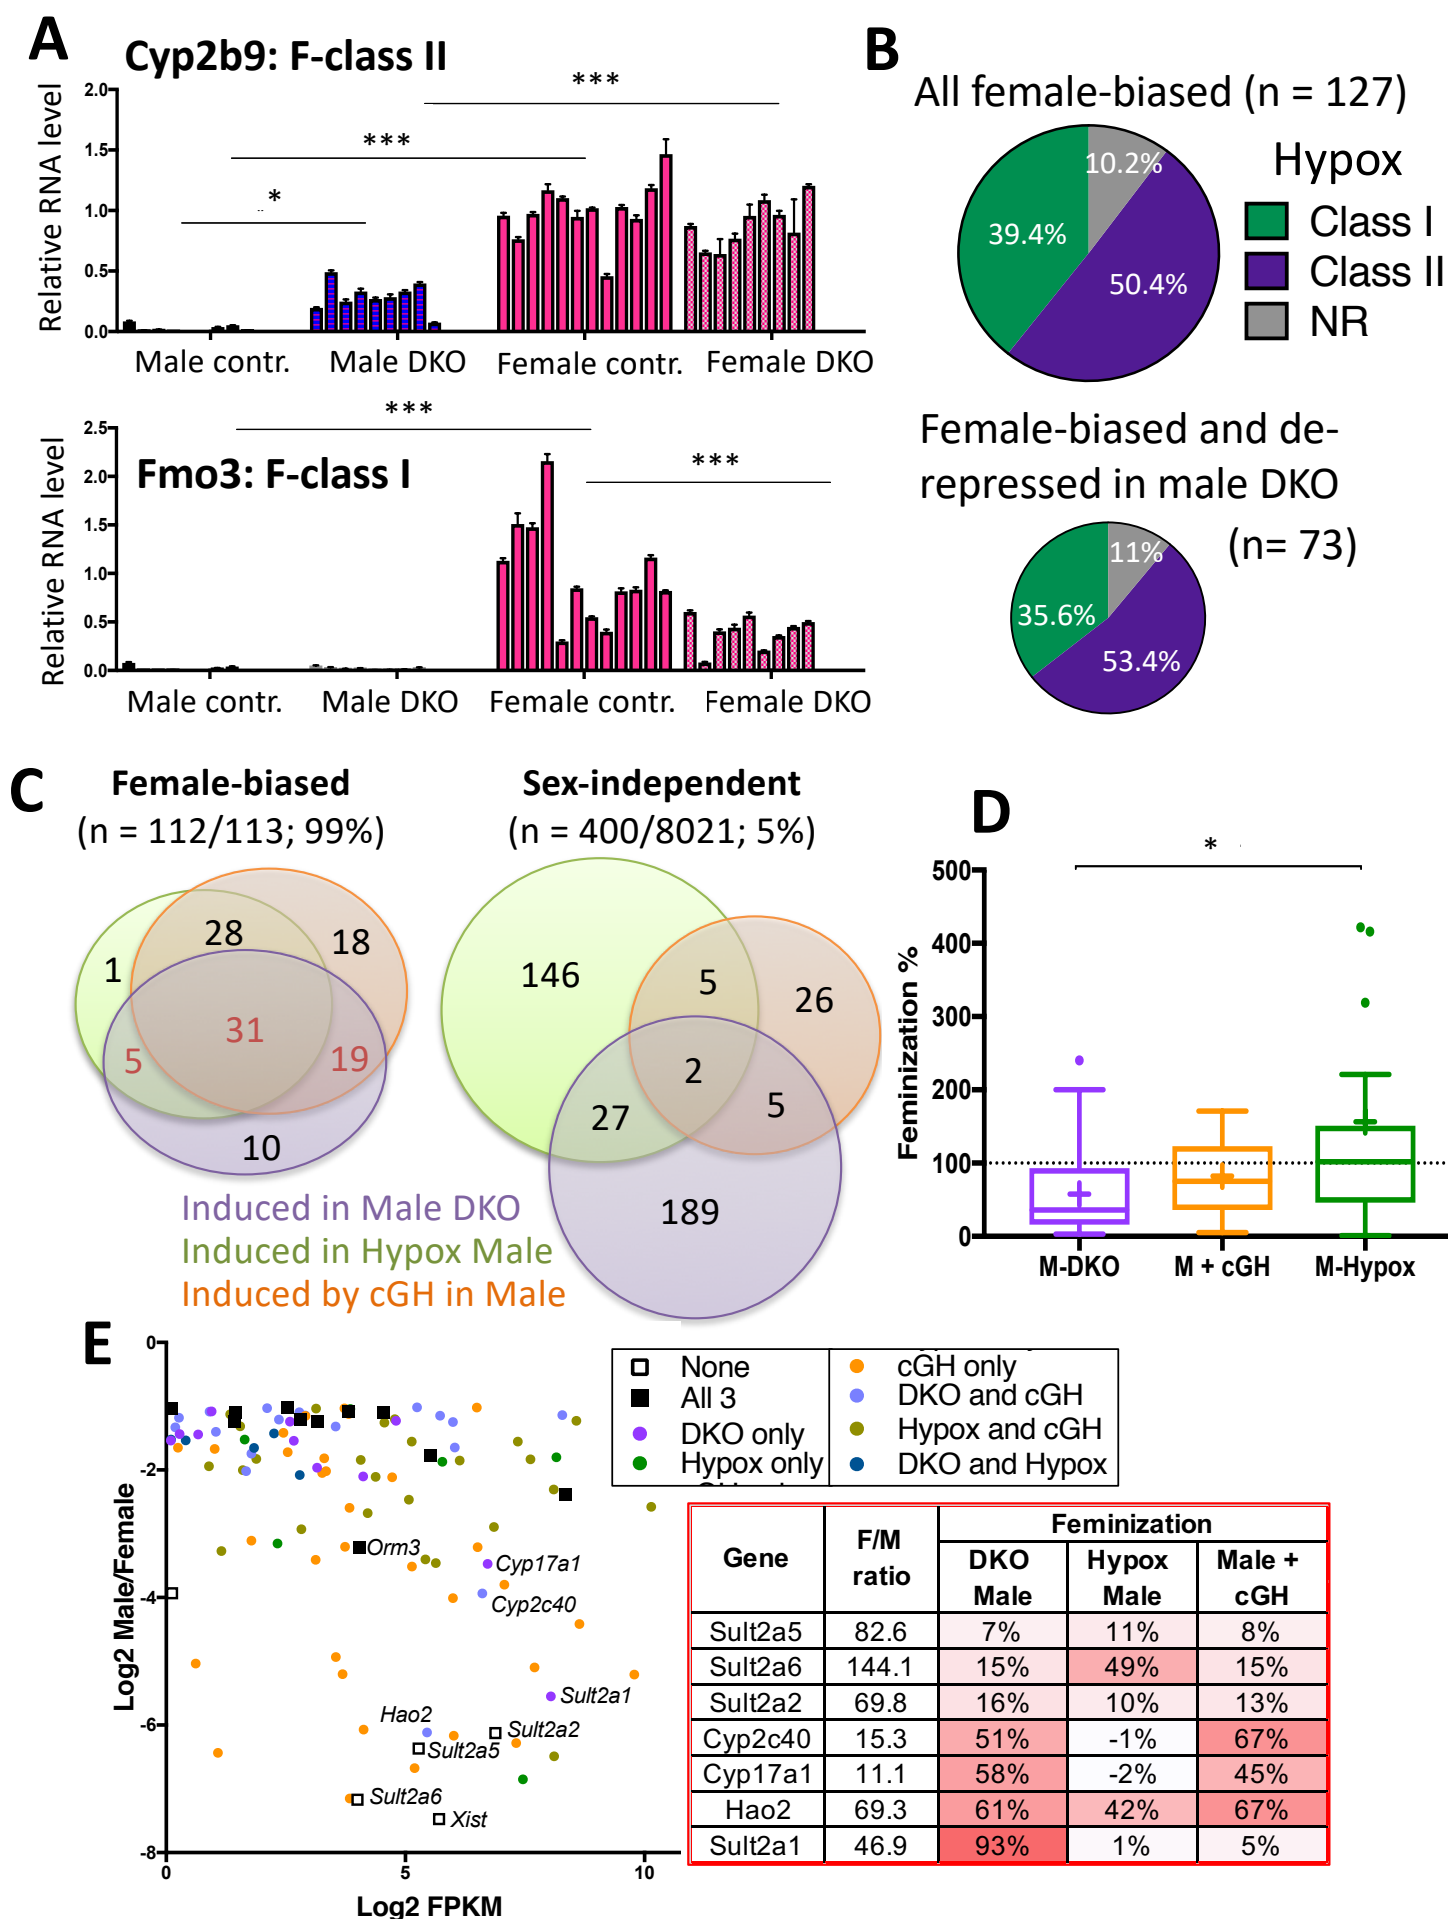

Fig. 4

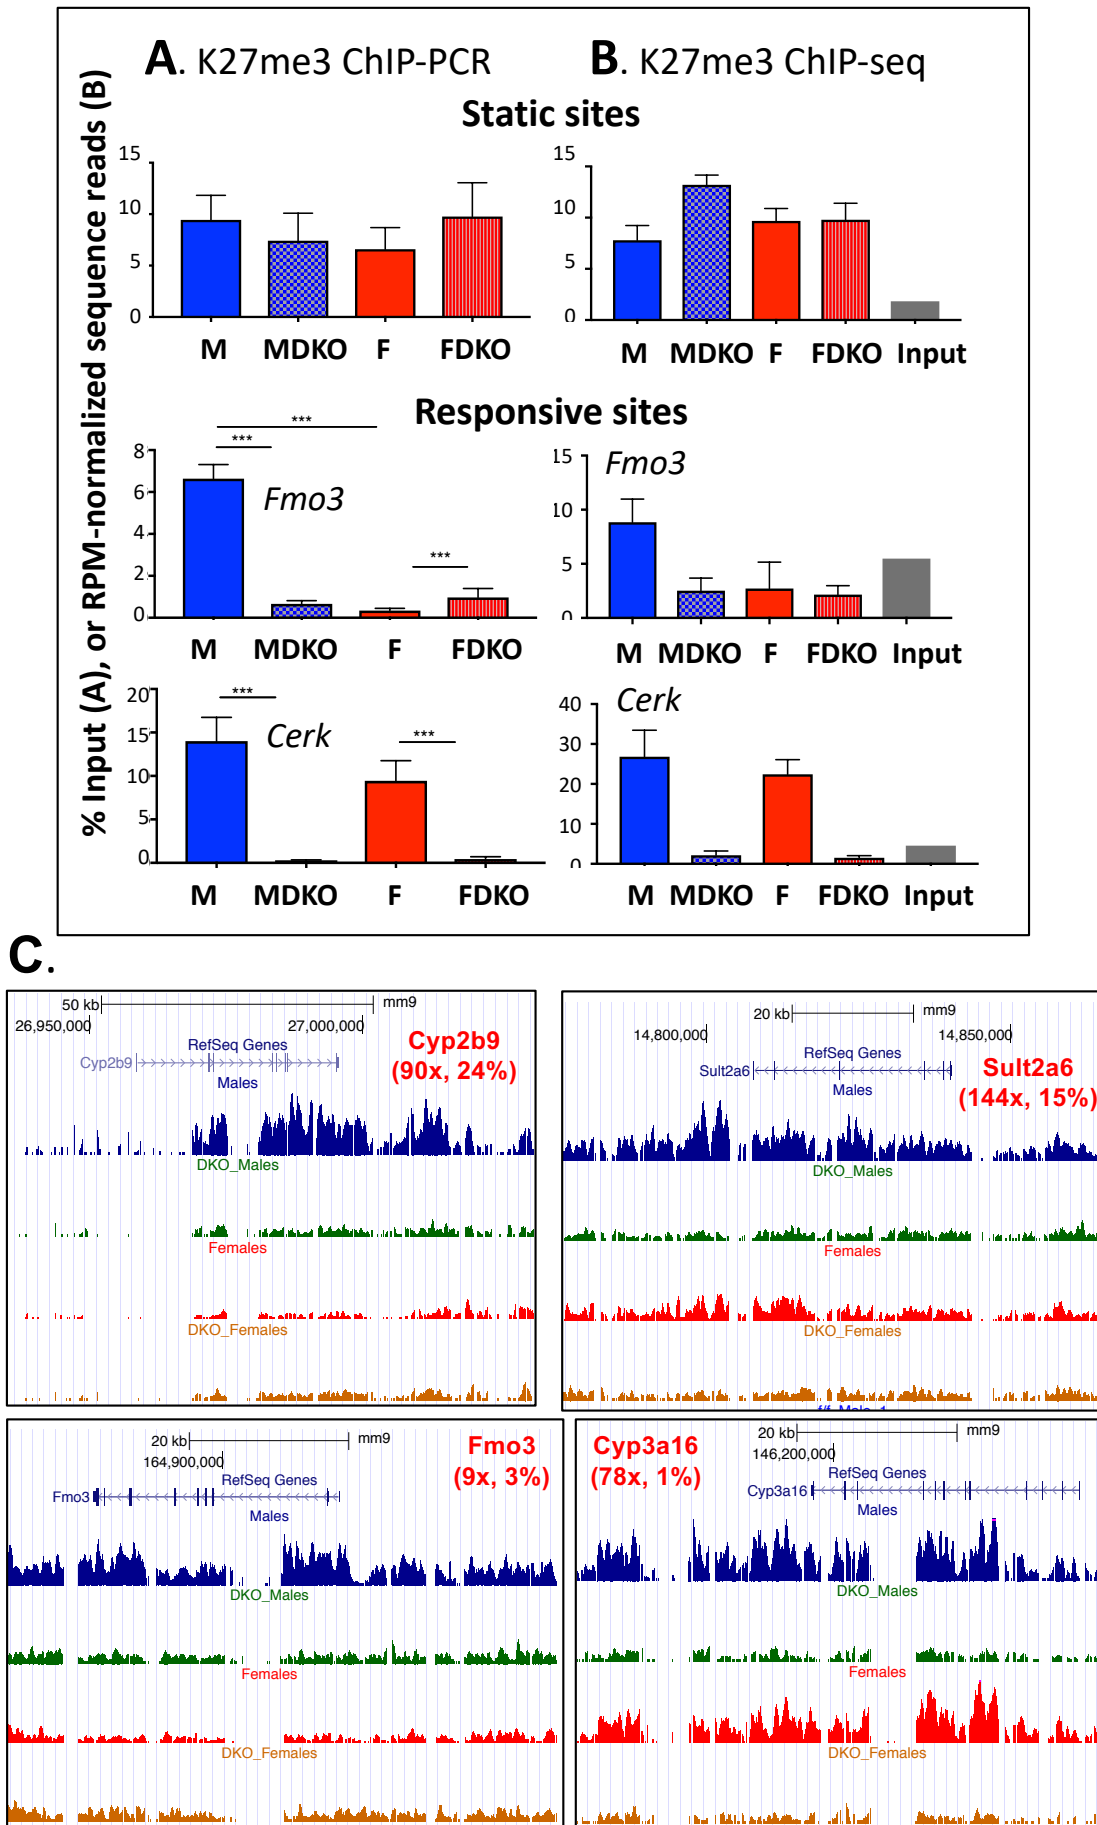

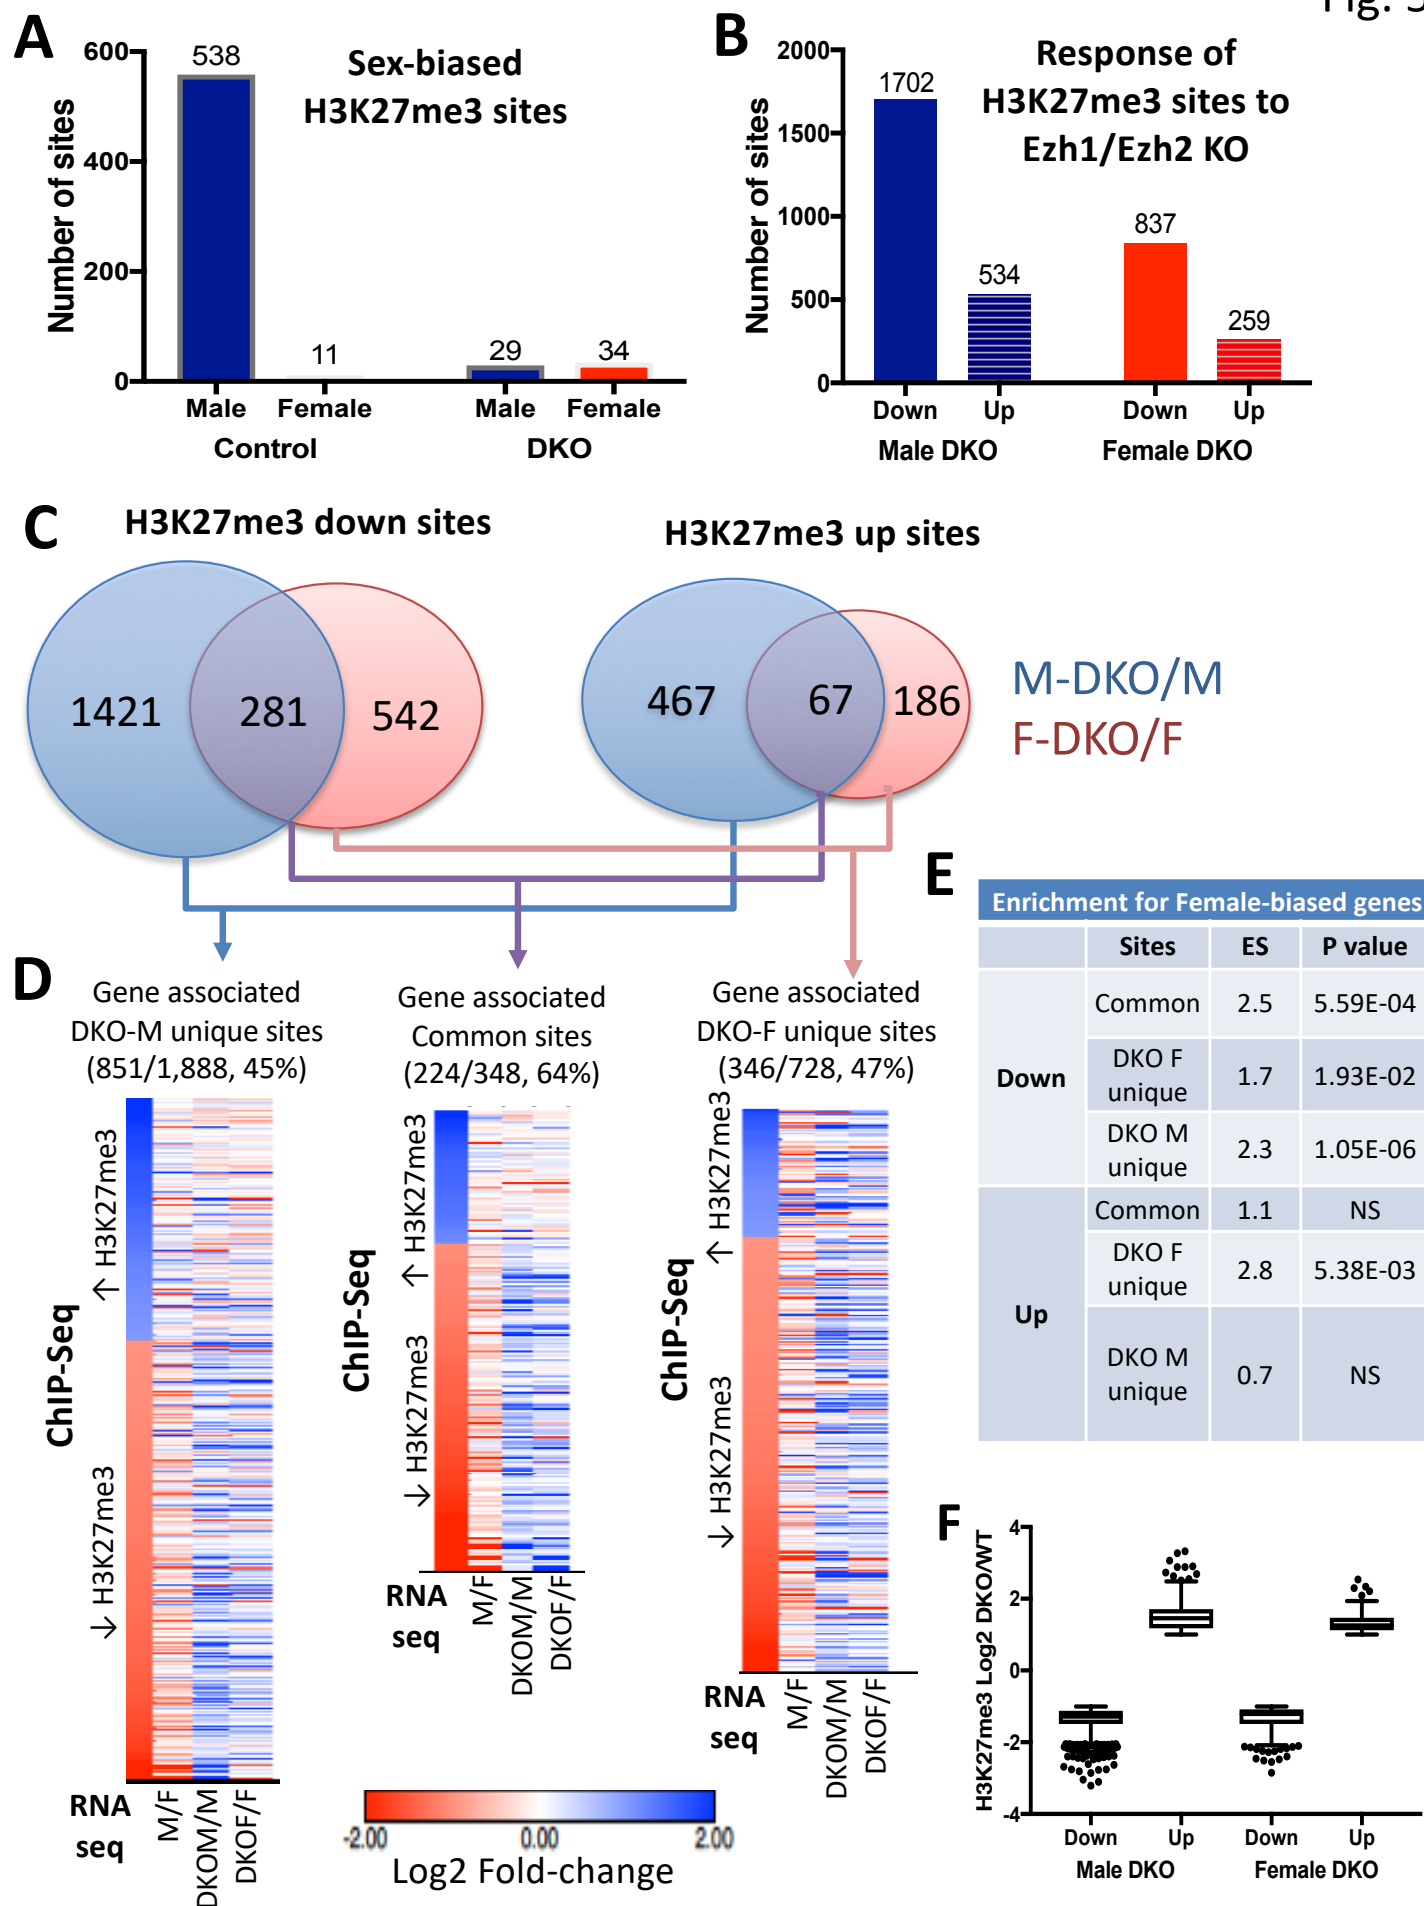

### A Response to Ezh1/Ezh2 loss

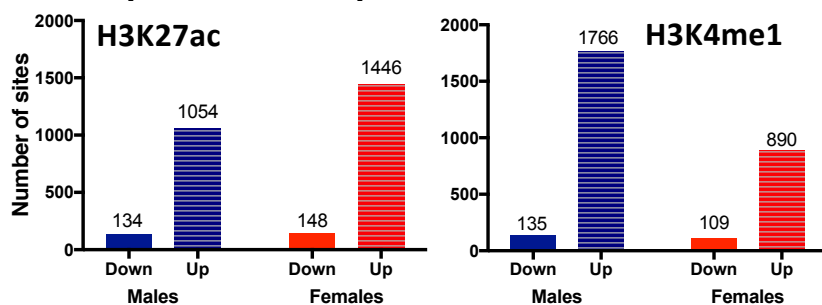

### C

Stringent sex-indep.  
up regulated genes

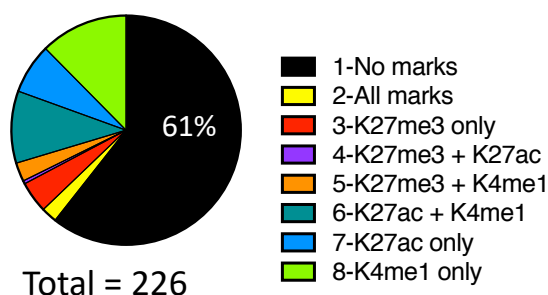

Total = 226

Sex-biased  
up regulated  
genes

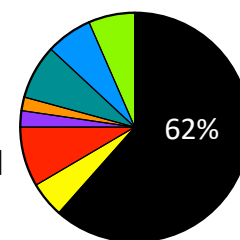

Total = 260

### B Sex-biased sites

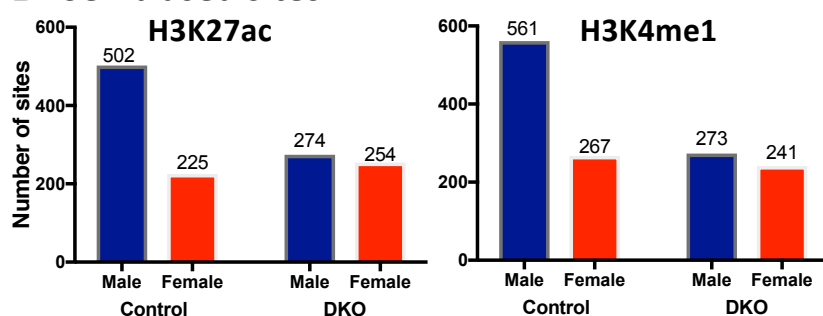

### D All Up-regulated genes

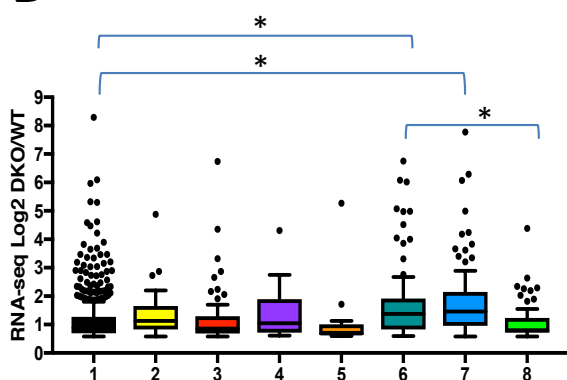

### E Female-biased genes

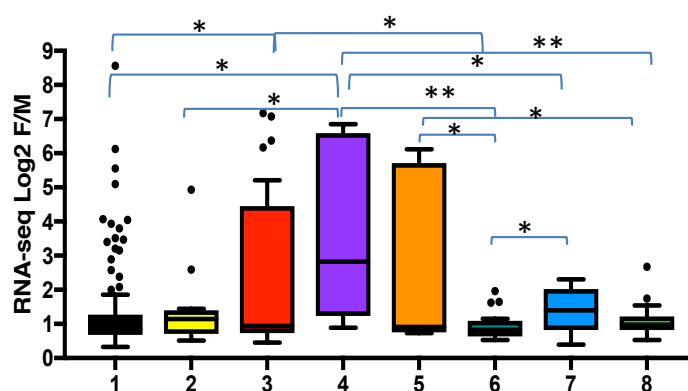

### Female-biased genes

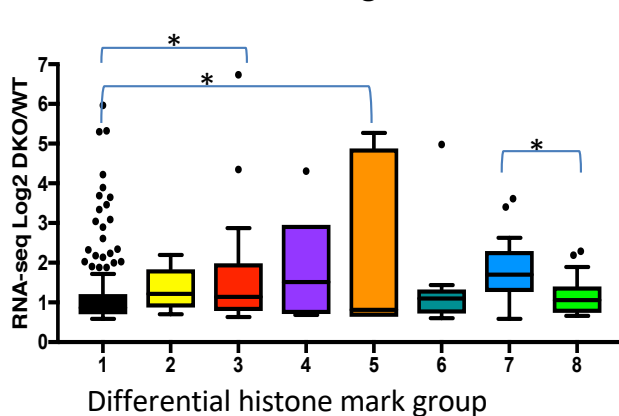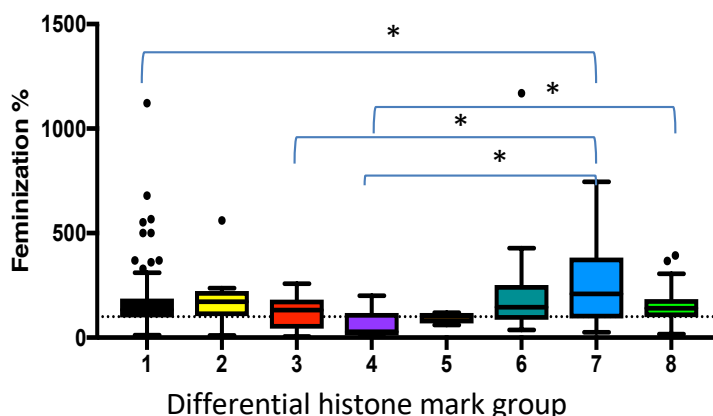

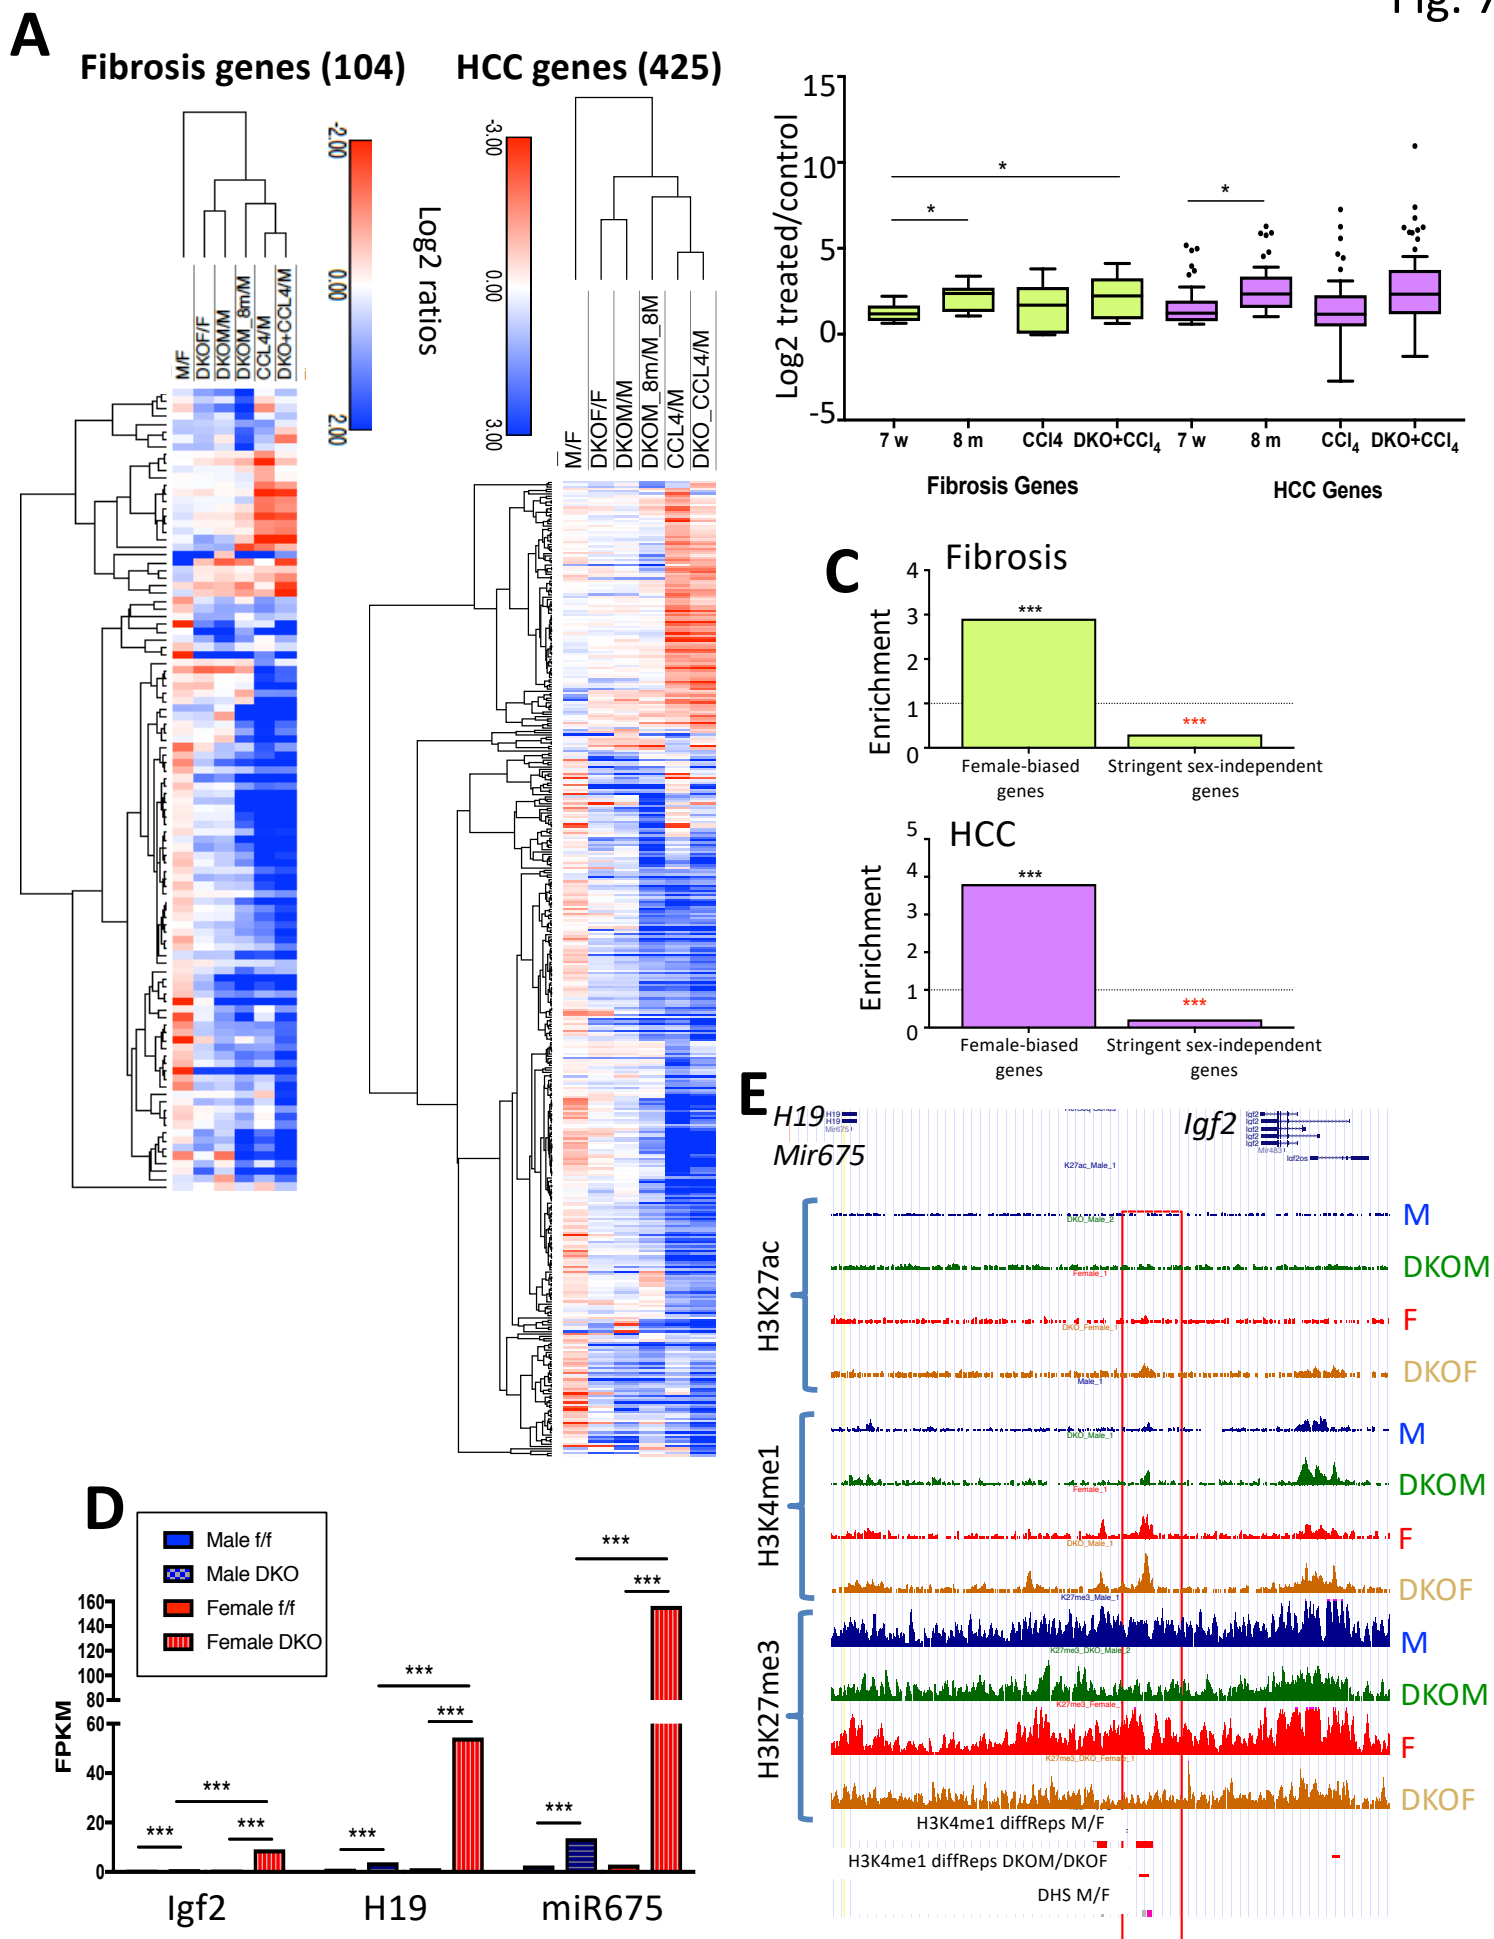



## Supplementary Materials

### Sex-biased genetic programs in liver metabolism and liver fibrosis are controlled by EZH1 and EZH2

Dana Lau-Corona, Woo Kyun Bae, Lothar Hennighausen, and David J Waxman

#### Supplementary Materials:

**Figures S1-S4**

**Tables S1-S11**

#### Supplemental Tables listing:

**Table S1.** qPCR primers used mRNA analysis and for validation of H3K27me3 static and H3K27me3 differential sites.

**Table S2.** 1,131 liver-expressed genes that showed a significant sex-bias in expression in control (floxed) mouse liver.

**Table S3.** 8,021 liver-expressed genes that show stringently sex-independent expression.

**Table S4A.** Responses of all liver-expressed genes (11,491 genes; FPKM >1) to loss of Ezh1/Ezh2 in male and female E1/E2-KO liver.

**Table S4B.** Responses of sex-biased genes to loss of Ezh1/Ezh2 in male and female E1/E2-KO liver.

**Table S4C.** Responses of stringently sex-independent genes to loss of Ezh1/Ezh2 in male and female E1/E2-KO liver.

**Table S5.** Set of 113 robust female-biased genes and their responses to E1/E2-KO, hypophysectomy, and continuous GH infusion in adult male liver.

**Table S6A-S6D.** Differential H3K27me3 sites in autosomes identified by diffReps.

**Table S6E-S6H.** Differential H3K27ac sites in autosomes identified by diffReps.

**Table S6I-S6L.** Differential H3K4me1 sites in autosomes identified by diffReps.

**Table S6M.** Up-regulated genes associated with differential histone marks.

**Table S7.** Expression data for a set of 217 genes involved in liver fibrosis.

**Table S8.** Expression data for a set of 920 genes associated with hepatocellular carcinoma (HCC).

**Table S9.** Listing of 82 genes that gain sex-bias in E1/E2-KO mouse liver.

**Table S10.** Imprinted genes that gain sex-bias in the E1/E2-KO.

**Table S11.** Contingency tables for the enrichments shown in Fig. 2, Fig. 5, and Fig. 7.

Fig. S1

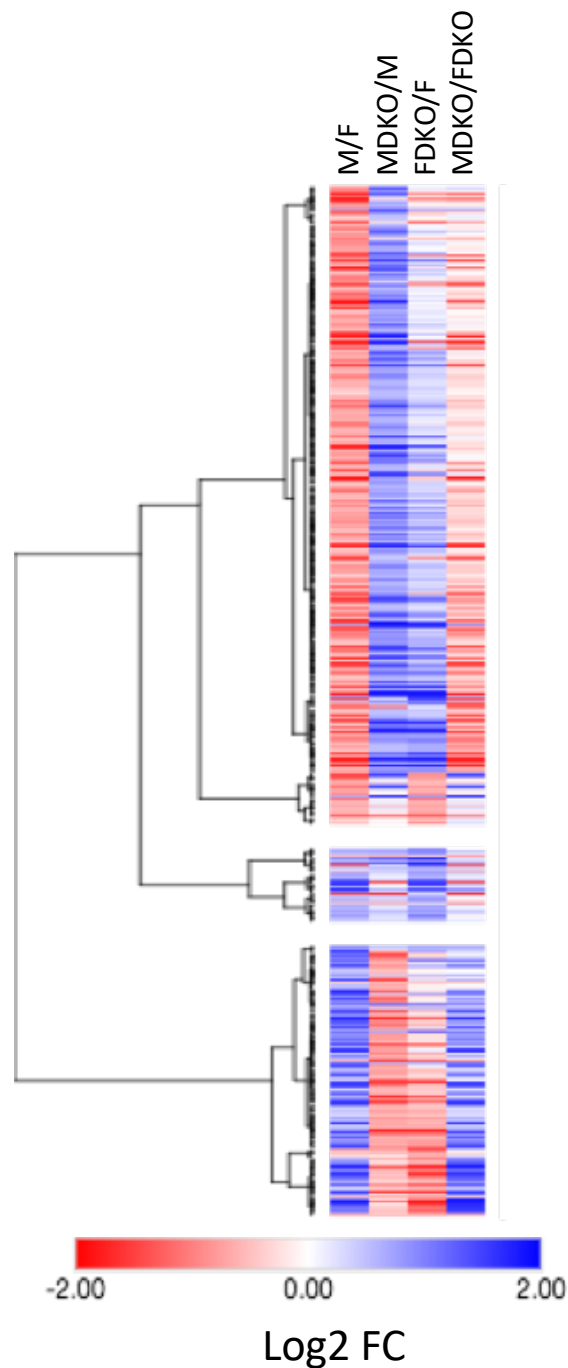

**Fig. S1. Heat map for the set of 440 E1/E2-KO-responsive sex-biased genes**, based on log<sub>2</sub> fold-change values for each of the four indicated comparisons. DKO, Ezh1/Ezh2 double knockout mouse liver.

| Gene Symbol                    | Male/Female (Wild-type liver sex ratio) |                  | Male DKO/Male control |                  | Female DKO / Female |                  | Male DKO /Female DKO |                  | Response in male liver |                                |
|--------------------------------|-----------------------------------------|------------------|-----------------------|------------------|---------------------|------------------|----------------------|------------------|------------------------|--------------------------------|
|                                | Fold Change                             | Adjusted p value | Fold Change           | Adjusted p value | Fold Change         | Adjusted p value | Fold Change          | Adjusted p value | Feminization %         | Histone mark group             |
| <b>Induced in Male liver</b>   |                                         |                  |                       |                  |                     |                  |                      |                  |                        |                                |
| <i>A1bg</i>                    | -37.00                                  | 5.84E-19         | 7.32                  | 6.42E-07         | 9.20                | 7.83E-18         | -46.63               | 8.60E-41         | 19.8                   | 3_K27me3_only                  |
| <i>Cyp17a1</i>                 | -11.09                                  | 7.98E-134        | 6.10                  | 1.64E-24         | 2.35                | 4.93E-20         | -4.25                | 3.35E-18         | 57.8                   | 1_No marks                     |
| <i>Cyp2b9</i>                  | -89.82                                  | 1.22E-62         | 19.81                 | 1.00E-32         | 1.01                | 1.00E+00         | -4.58                | 4.11E-79         | 23.6                   | 4_K27me3_and K27ac             |
| <i>Cyp2c69</i>                 | -34.24                                  | 6.82E-114        | 12.90                 | 3.19E-32         | 1.20                | 4.22E-01         | -3.19                | 1.12E-09         | 40.1                   | 1_No marks                     |
| <i>Hao2</i>                    | -69.33                                  | 2.50E-212        | 38.60                 | 9.86E-76         | 1.57                | 5.95E-09         | -2.85                | 1.50E-21         | 60.5                   | 5_K27me3_and K4me1             |
| <i>Sult2a1</i>                 | -46.89                                  | 7.60E-14         | 39.41                 | 3.02E-32         | 16.99               | 6.48E-13         | -20.33               | 1.54E-58         | 0.9                    | 1_No marks                     |
| <i>Sult2a5</i>                 | -82.60                                  | 3.64E-15         | 6.29                  | 3.89E-03         | 4.90                | 1.72E-06         | -63.20               | 1.72E-146        | 7.3                    | 3_K27me3_only                  |
| <i>Sult2a6</i>                 | -144.13                                 | 3.24E-13         | 20.40                 | 2.87E-05         | 3.29                | 1.33E-03         | -23.91               | 2.38E-50         | 14.9                   | 3_K27me3_only                  |
| <b>Induced in Female liver</b> |                                         |                  |                       |                  |                     |                  |                      |                  |                        |                                |
| <i>Cyp3a16</i>                 | -9.25                                   | 0.00             | 1.17                  | 1.00             | 35.77               | 0.00             | -283.08              | 0.00             | 3.1                    | None (not Male DKO-responsive) |
| <b>Not induced</b>             |                                         |                  |                       |                  |                     |                  |                      |                  |                        |                                |
| <i>Fmo3</i>                    | -77.88                                  | 0.00             | 1.30                  | 1.00             | -2.47               | 0.00             | -23.98               | 0.00             | 0.6                    | None (not Male DKO-responsive) |

## Induced in male liver

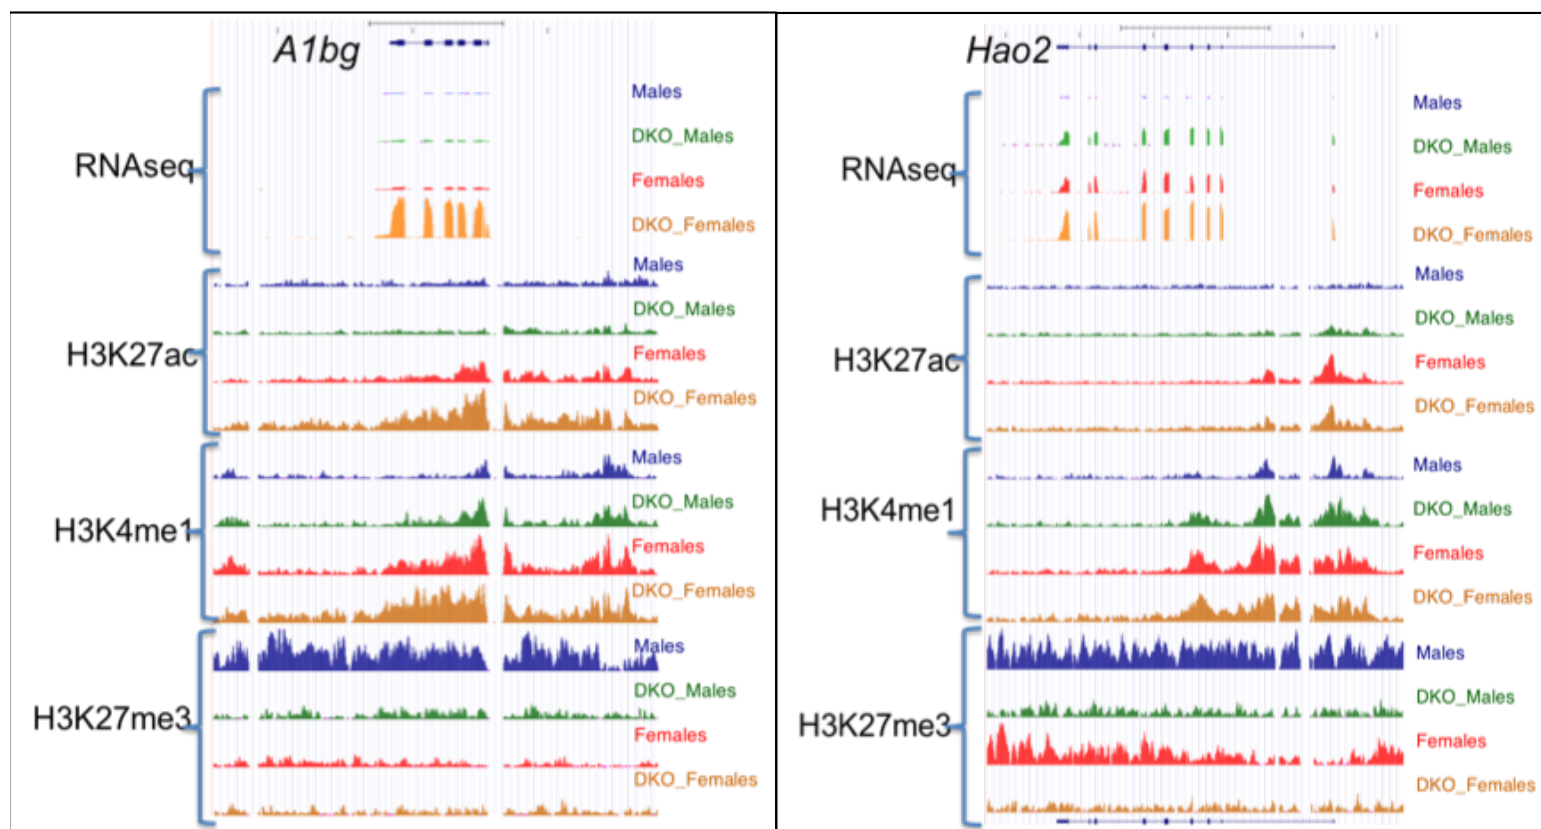

**Fig. S2. E1/E2-KO-responsive female-biased genes.** **A**, top. Listing of expression data for genes whose UCSC Browser screenshots are shown in this figure. Data shown are fold-change and adjusted p-value for each of the following comparisons: Male control vs. Female control, Male E1/E2-KO vs. Male control, Female E1/E2-KO vs. Female control, and Male E1/E2-KO vs Female E1/E2-KO. For those genes that are de-repressed in E1/E2-KO male livers, a feminization percentage and the differential histone mark group is indicated. **Panels A-D**, UCSC screenshots of normalized RNA-seq or ChIPseq reads for the indicated genes. DKO, Ezh1/Ezh2 double knockout mouse liver.

## Induced in male liver

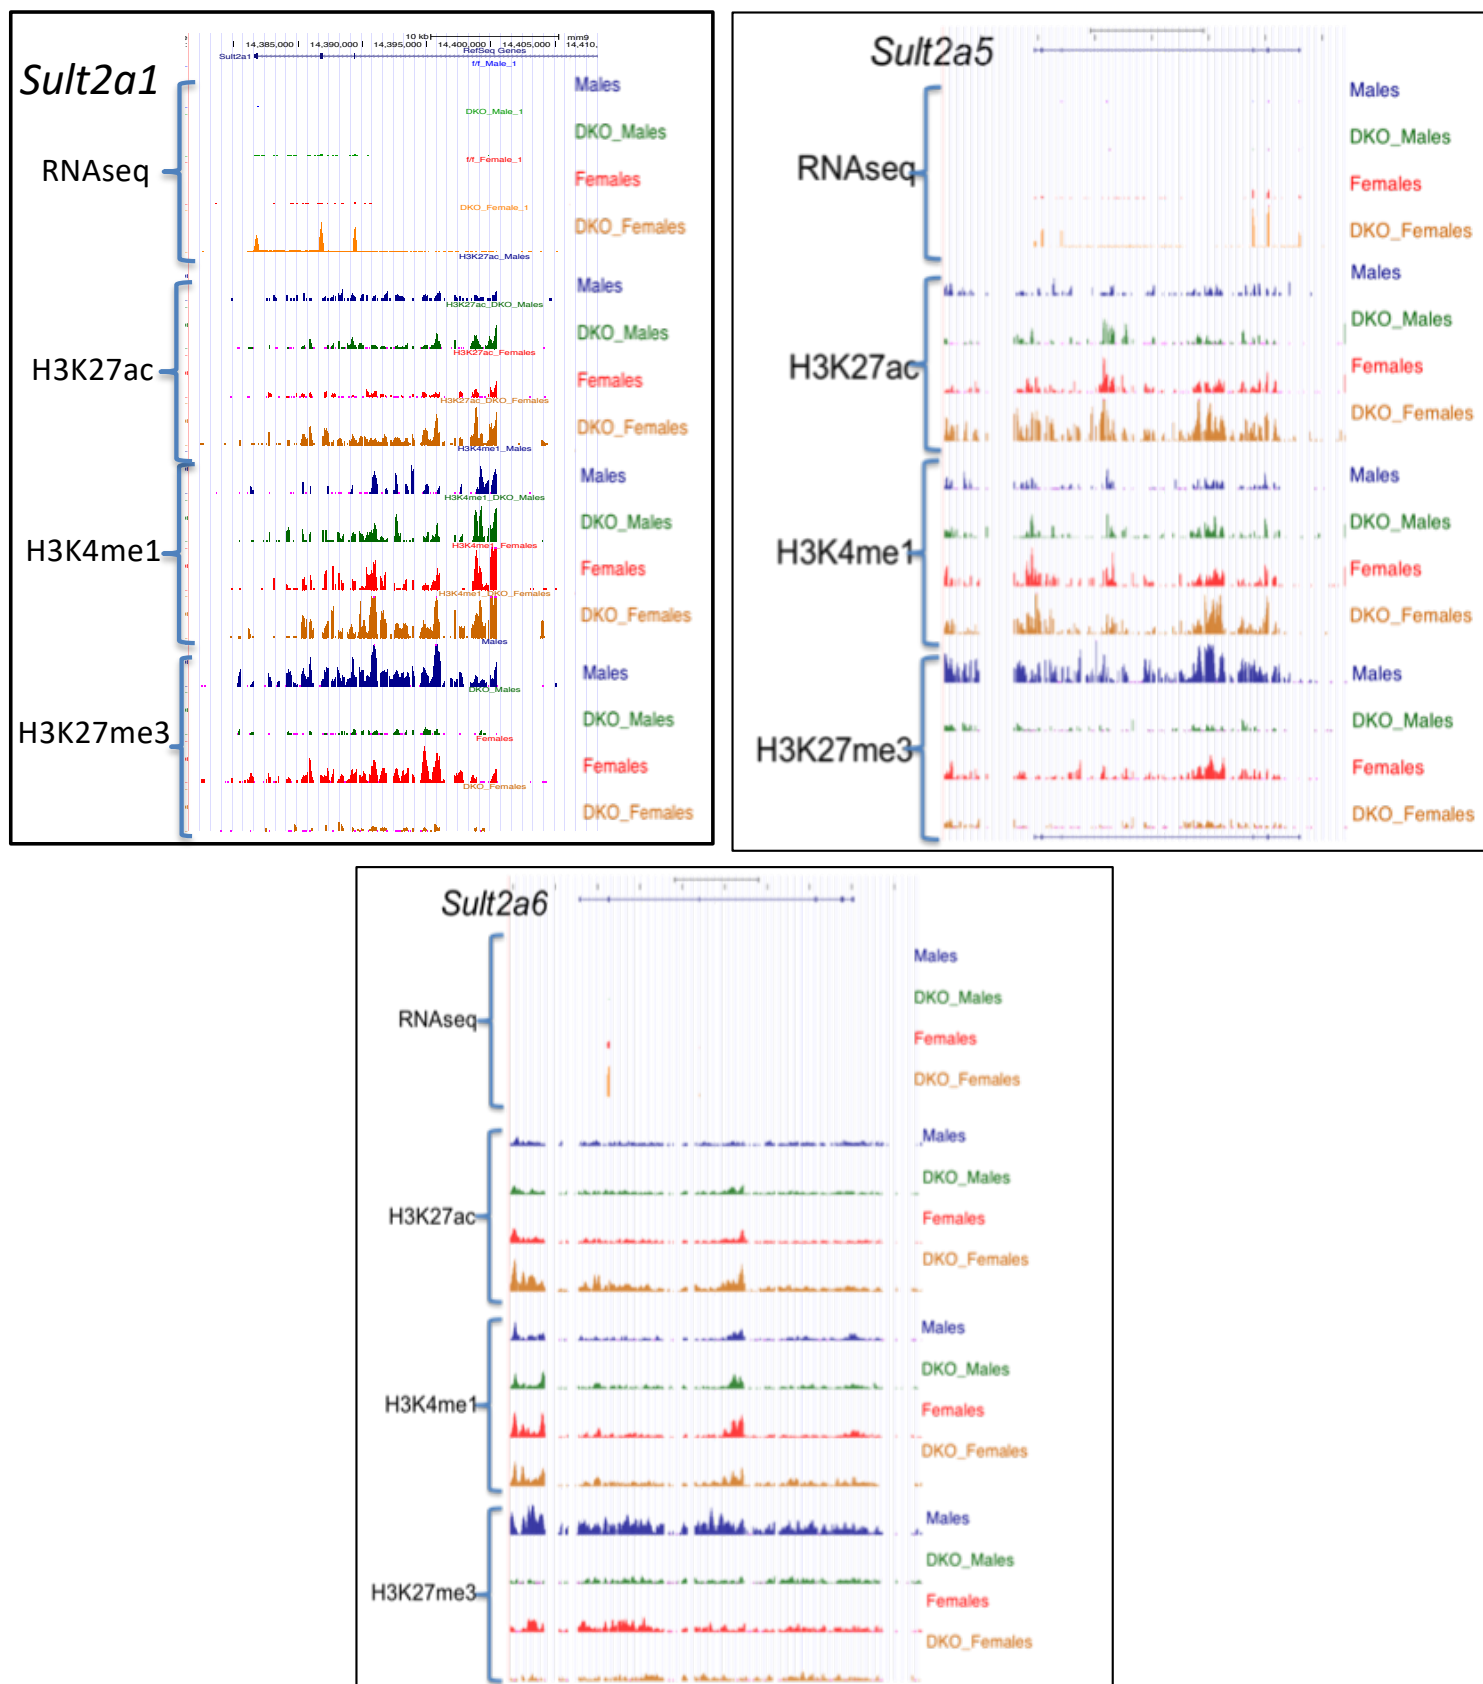

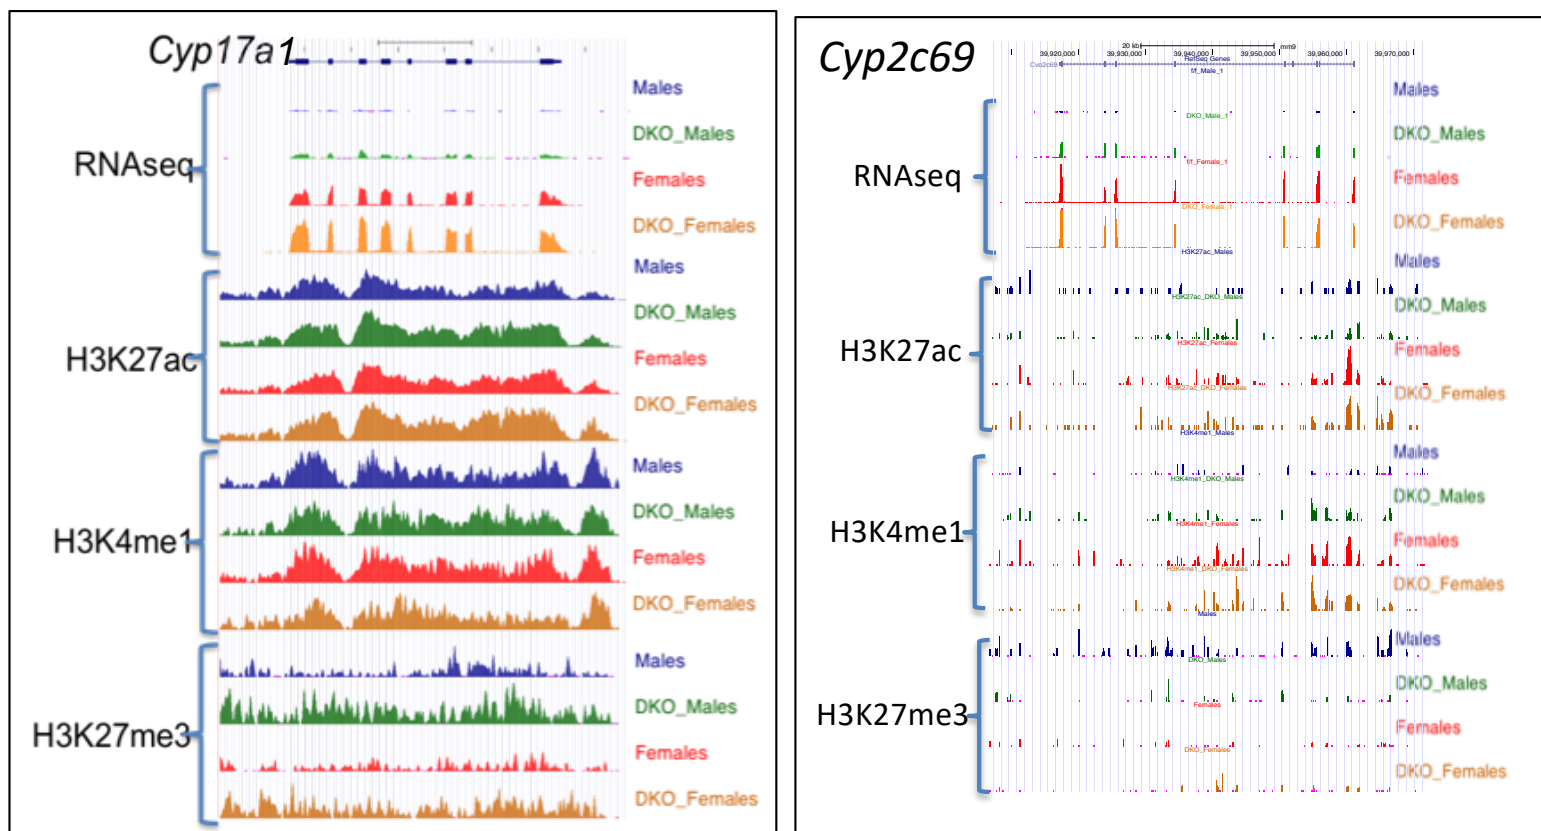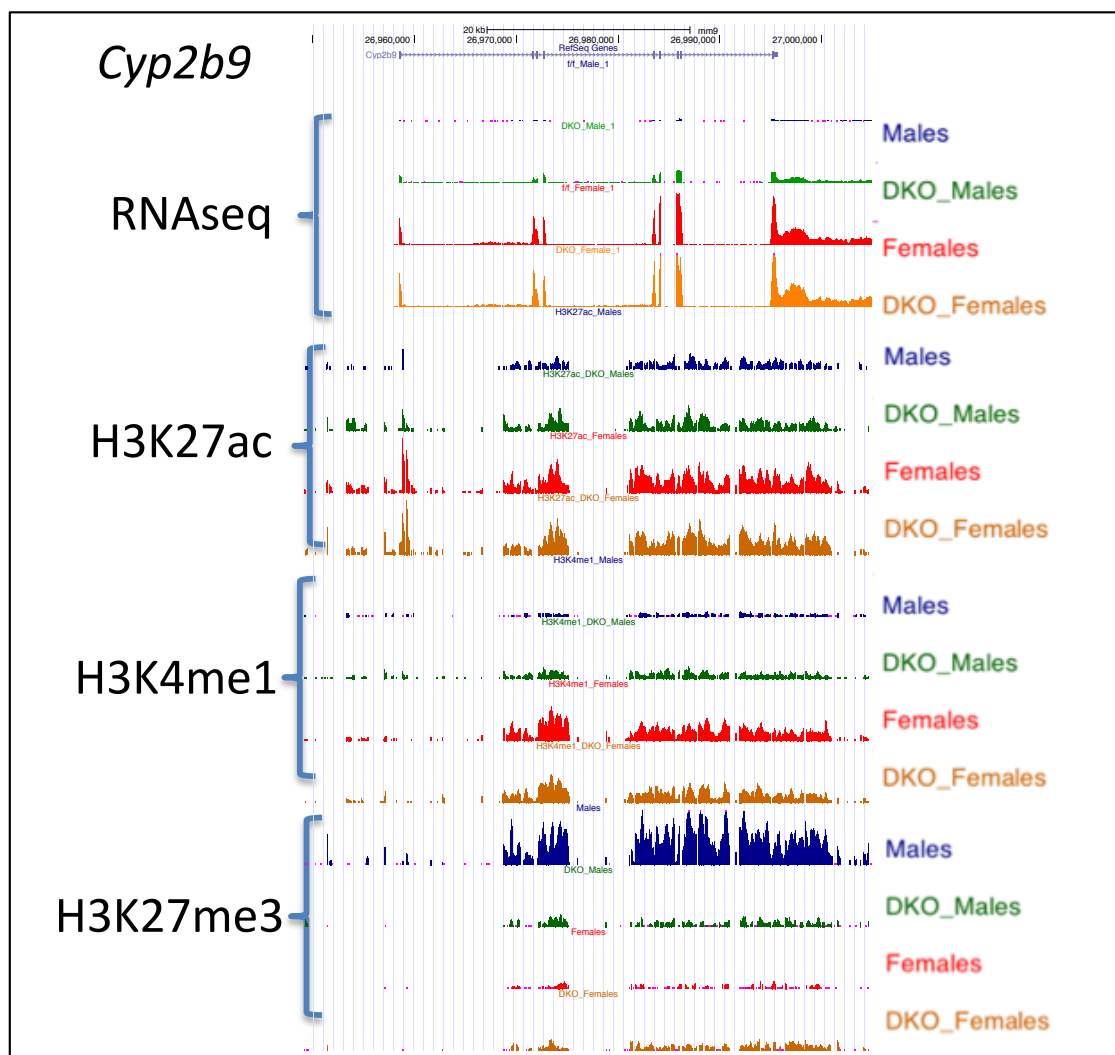

## Not induced in male liver

Fig. S2D

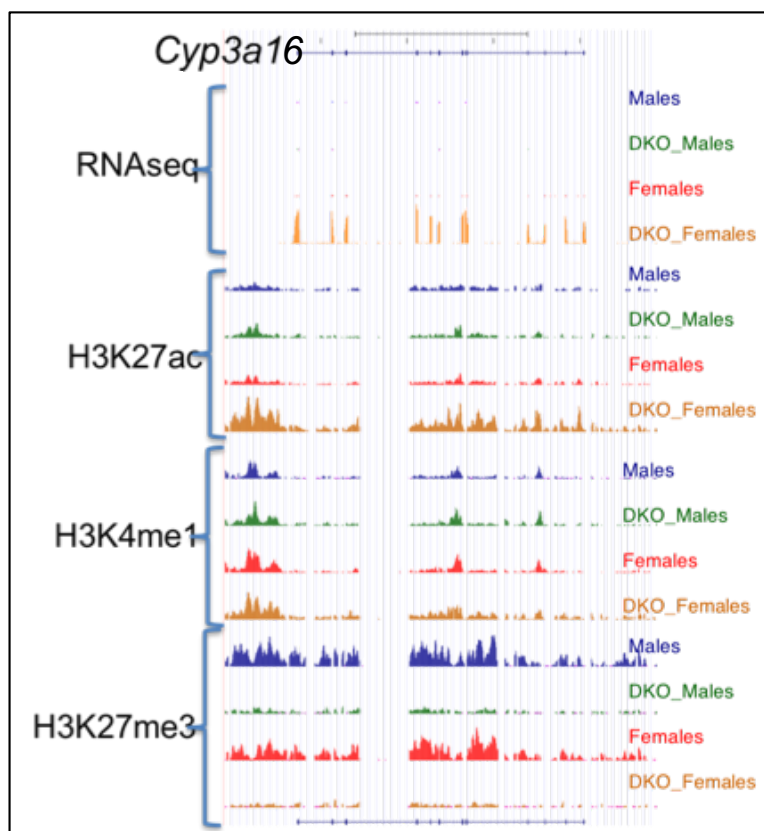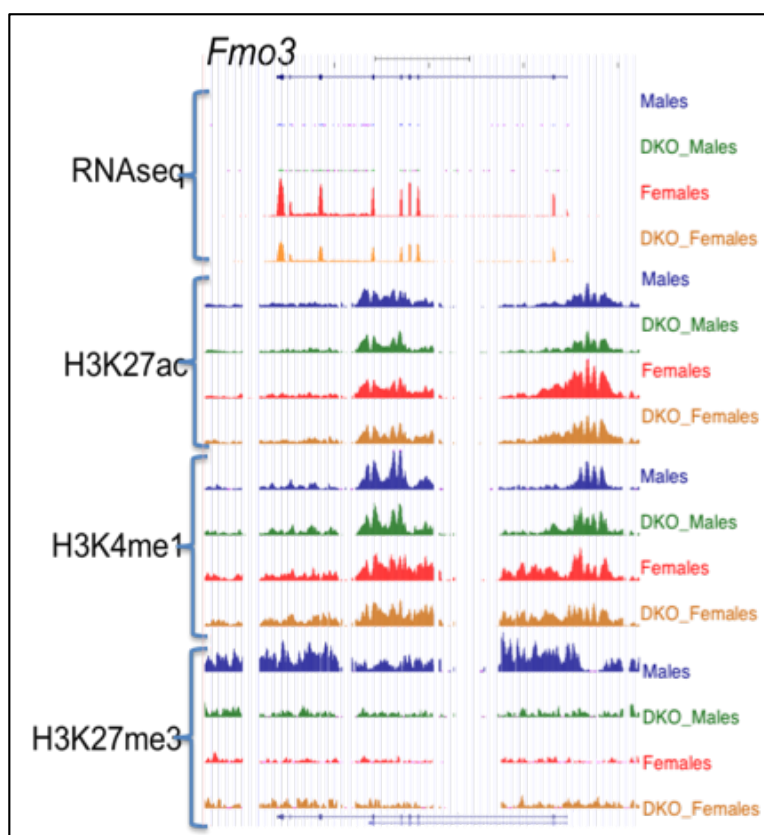

## Static Sites

Fig. S3

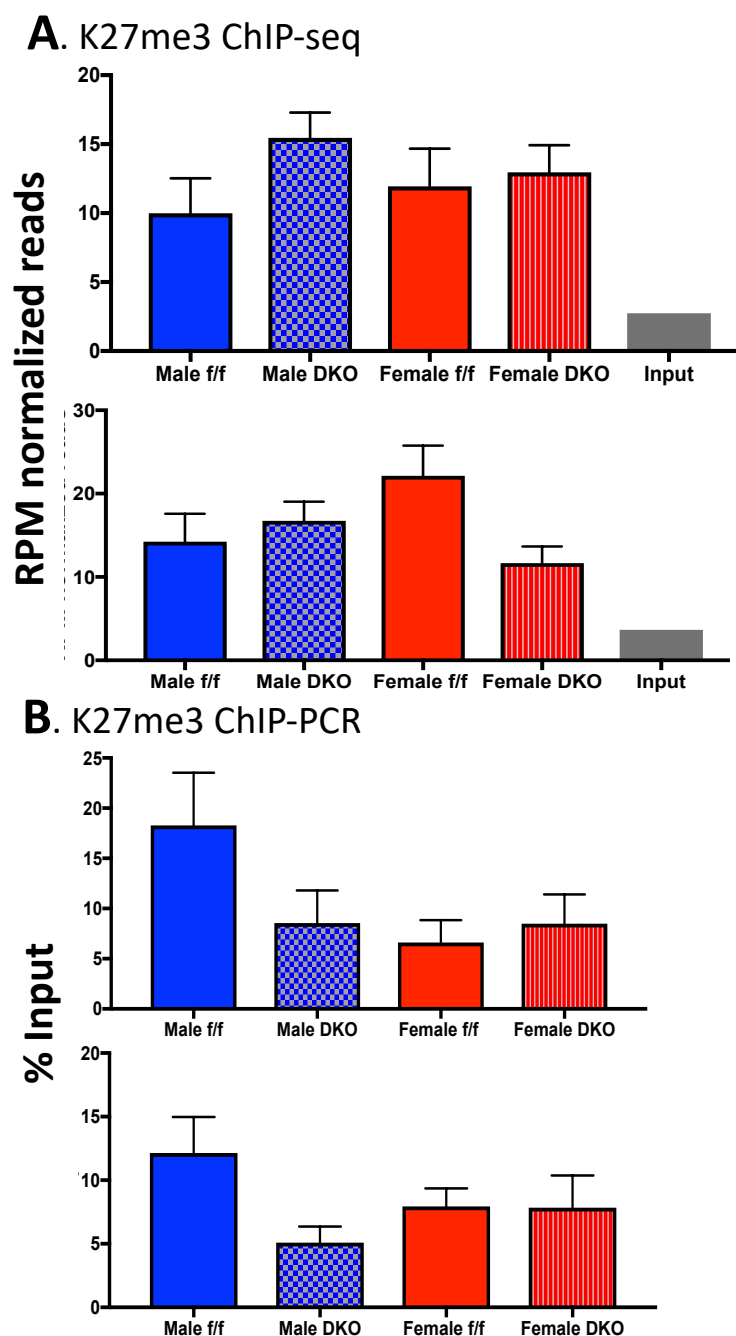

**Fig. S3. Normalization of H3-K27me3 ChIP-seq.** Reads per million (RPM) normalized sequence read counts and ChIP-qPCR validation of static H3K27me3 sites for each of the groups and for the input control. Read counts were obtained for the genomic location corresponding to the qPCR amplicon plus 100 bp to approximate the 200 bp average sequence library insert size. The qPCR data corresponds to % input for  $n=4$  individuals per group, MEAN  $\pm$  SEM. The genomic regions interrogated map to two intergenic static regions (qPCR amplicons: Chr 7: 53,631,859-53,631,958) and Chr 15: 66,117,216-66,117,274). Primers used for qPCR are shown in Table S1B. DKO, Ezh1/Ezh2 double knockout mouse liver.

## A. H3K27ac

## B. H3K4me1

### Female-biased sites

Control

DKO

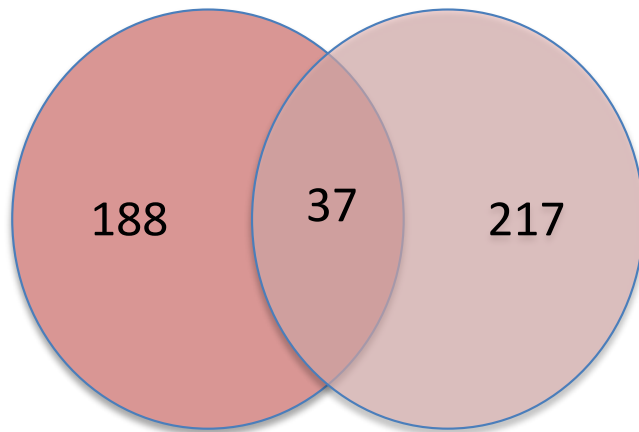

Control

DKO

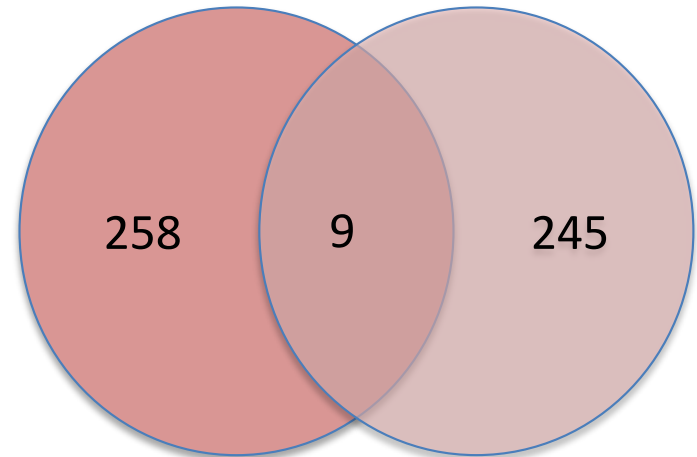

### Male-biased sites

Control

DKO

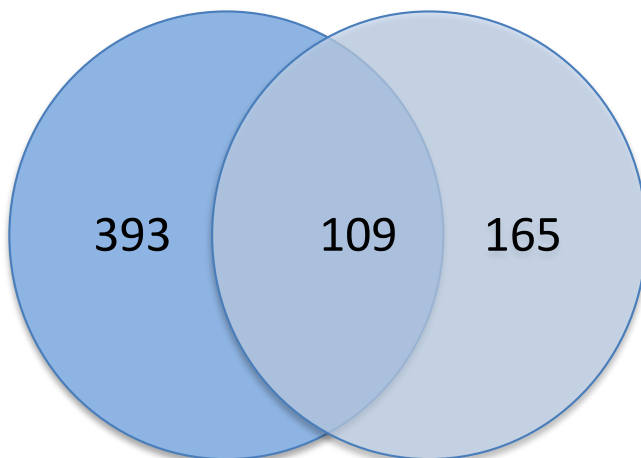

Control

DKO

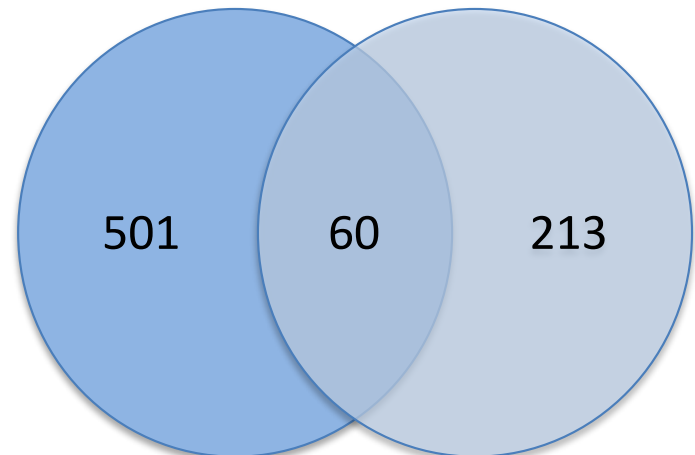

### Fig. S4. Sex-biased H3K27ac and H3K4me1 sites presented in Fig. 6B.

Venn diagrams show the low degree of overlap between the sex-biased sites identified in control livers and those identified in E1/E2-KO livers. This low overlap between the sets of sex-biased H3K27ac and H3K4me1 sites in control, compared to E1/E2-KO mouse liver, indicates that sex-biased chromatin marks are both gained and lost in Ezh1/Ezh2-deficient liver. DKO, Ezh1/Ezh2 double knockout mouse liver.
